# 1 The antibiotic bedaquiline activates host macrophage innate 2 immune resistance to bacterial infection

3 Alexandre Giraud-Gatineau<sup>1,2</sup>, Juan Manuel Coya<sup>3,8</sup>, Alexandra Maure<sup>1,2,8</sup>, Anne Biton<sup>4,8</sup>,  
4 Michael Thomson<sup>5</sup>, Elliott M. Bernard<sup>6</sup>, Maximiliano G. Gutierrez<sup>6</sup>, Gérald Larrouy-Maumus<sup>5</sup>,  
5 Roland Brosch<sup>1,9</sup>, Brigitte Gicquel<sup>3,7,9</sup>, Ludovic Tailleux<sup>1,3,\*</sup>

6 <sup>1</sup>Unit for Integrated Mycobacterial Pathogenomics, Institut Pasteur, Paris, France. <sup>2</sup>Université Paris Diderot,  
7 Sorbonne Paris Cité, Cellule Pasteur, Paris, France. <sup>3</sup>Mycobacterial Genetics Unit, Institut Pasteur, Paris, France.

8 <sup>4</sup>Bioinformatics and Biostatistics, Department of Computational Biology, USR 3756 CNRS, Institut Pasteur, Paris,  
9 France. <sup>5</sup>MRC Centre for Molecular Bacteriology and Infection, Department of Life Sciences, Faculty of Natural

10 Sciences, Imperial College London, London, SW7 2AZ, United Kingdom. <sup>6</sup>Host-Pathogen Interactions in  
11 Tuberculosis Laboratory, The Francis Crick Institute, 1 Midland Road, NW1 1AT London, United Kingdom.

12 <sup>7</sup>Department of Tuberculosis Control and Prevention, Shenzhen Nanshan Center for Chronic Disease Control,  
13 Shenzhen, China. <sup>8</sup>These authors contributed equally: Juan Manuel Coya, Alexandra Maure, Anne Biton. <sup>9</sup>These

14 authors jointly supervised this work: Roland Brosch, Brigitte Gicquel. \*For correspondence:  
15 [ludovic.tailleux@pasteur.fr](mailto:ludovic.tailleux@pasteur.fr)

16

17

## 18 **Abstract**

19 Antibiotics are widely used in the treatment of bacterial infections. Although known for their  
20 microbicidal activity, antibiotics may also interfere with the host's immune system. Here we  
21 analyzed the effects of bedaquiline (BDQ), an inhibitor of the mycobacterial ATP synthase, on  
22 human macrophages. Genome-wide gene expression analysis revealed that BDQ  
23 reprogramed macrophages into potent bactericidal phagocytes. We found that 1,495 genes  
24 were differentially expressed in *M. tuberculosis*-infected macrophages incubated with the  
25 drug, with an over-representation of genes involved in metabolism, lysosome biogenesis and  
26 activation. BDQ treatment triggered a variety of antimicrobial defense mechanisms, including  
27 nitric oxide production, phagosome-lysosome fusion, and autophagy. These effects were  
28 associated with activation of transcription factor EB (TFEB), involved in the transcription of  
29 lysosomal genes, resulting in enhanced intracellular killing of different bacterial species that  
30 were naturally insensitive to BDQ. Thus, BDQ could be used as a host-directed therapy  
31 against a wide range of bacterial infections.

32

33

## 34 **Introduction**

35

36 Antibiotics are commonly used in the treatment of bacterial infections, and, in effectively  
37 combating such diseases, have substantially increased human life expectancy. As with most  
38 drugs, antibiotic treatment can also alter host metabolism, leading to adverse side-effects,  
39 including nausea, hepatotoxicity, skin reactions, and gastrointestinal and neurological

40 disorders. Such side-effects can become critical when antibiotic treatment is long and  
41 involves several drugs, as in the treatment of tuberculosis (TB), where 2–28% of patients  
42 develop mild liver injury during treatment with first-line drugs (Agal et al., 2005).

43

44 Antibiotics can interfere with the immune system, indirectly through the disturbance of the  
45 body's microbiota (Ubeda and Pamer, 2012), or directly by modulating the functions of  
46 immune cells. Such interactions may impact treatment efficacy or the susceptibility of the host  
47 to concomitant infection. For example, after treatment completion, TB patients are more  
48 vulnerable to reactivation and reinfection of the disease, suggesting therapy-related immune  
49 impairment (Cox et al., 2008). Drug-sensitive TB can be cured by combining up to 4  
50 antibiotics in a 6-month treatment; specifically, isoniazid (INH), rifampicin (RIF), ethambutol  
51 and pyrazinamide (PZA) for 2 months, and INH and RIF for additional 4 months. INH induces  
52 apoptosis of activated CD4<sup>+</sup> T cells in *Mycobacterium tuberculosis* (MTB)-infected mice  
53 (Tousif et al., 2014) and leads to a decrease in Th1 cytokine production in household contacts  
54 with latent TB under preventive INH therapy (Biraro et al., 2015). RIF has immunomodulatory  
55 properties and acts as a mild immunosuppressive agent in psoriasis (Tsankov and Grozdev,  
56 2011). RIF reduces inflammation by inhibiting I $\kappa$ B $\alpha$  degradation, mitogen-activated protein  
57 kinase (MAPK) phosphorylation (Bi et al., 2011), and Toll-like receptor 4 signaling (Wang et  
58 al., 2013). PZA treatment of MTB-infected human monocytes and mice significantly reduces  
59 the release of pro-inflammatory cytokines and chemokines (Manca et al., 2013). It is therefore  
60 necessary to understand how antibiotic treatment modulates macrophage (M $\phi$ ) functions, and  
61 more generally, how it impacts the host immune response.

62

63 The world-wide rise in antibiotic resistance is a major threat to global health care. A growing  
64 number of bacterial infections, such as pneumonia, salmonellosis, and TB, are becoming  
65 harder to treat as the antibiotics used to treat them become less effective. While new  
66 antibiotics are being developed and brought to the clinic, their effects on the human immune  
67 system are not being studied in-depth. Here, we have investigated the impact of a recently  
68 approved anti-TB drug, bedaquiline (BDQ), on the transcriptional responses of human M $\phi$ s  
69 infected with MTB. M $\phi$ s are the primary cell target of MTB, which has evolved several  
70 strategies to survive and multiply inside the M $\phi$ s phagosome, including prevention of  
71 phagosome acidification (Sturgill-Koszycki et al., 1994), inhibition of phagolysosomal fusion  
72 (Armstrong and Hart, 1975) and phagosomal rupture (Simeone et al., 2012; van der Wel et  
73 al., 2007). They play a central role in the host response to TB pathogenesis, by orchestrating  
74 the formation of granulomas, presenting mycobacterial antigens to T cells, and killing the  
75 bacillus upon IFN- $\gamma$  activation (Cambier et al., 2014). BDQ is a diarylquinoline that specifically  
76 inhibits a subunit of the bacterial adenosine triphosphate (ATP) synthase, decreasing  
77 intracellular ATP levels (Andries et al., 2005; Koul et al., 2007). It has 20,000 times less  
78 affinity for human ATP synthase (Haagsma et al., 2009). The most common side effects of  
79 BDQ are nausea, joint and chest pain, headache, and arrhythmias (Diacon et al., 2012;

80 Diacon et al., 2014). However, possible interactions between BDQ and the host immune  
81 response have not been studied in detail. Understanding the impact of BDQ on the host  
82 immune response may help to develop strategies aiming at improving drug efficacy and  
83 limiting side-effects, including cytotoxicity, alteration of cell metabolism, and  
84 immunomodulation.

85

86

## 87 **Results**

88

### 89 **BDQ modulates the response of MTB-infected Mφs**

90 In order to exclude potential differences due to the MTB bacillary load between treated and  
91 untreated cells, we generated a virulent BDQ-resistant strain of *M. tuberculosis* (BDQr-MTB).  
92 The selected clone, which carried a Ala63→Pro mutation in subunit c of the ATP synthase  
93 (Andries et al., 2005) (*Figure supplement 1A*), had a similar generation time to wild-type  
94 bacteria when cultured in 7H9 liquid medium (*Figure supplement 1B*). We also observed no  
95 difference in intracellular growth of the mutated and wild-type strains (*Figure supplement 1C*).

96

97 We infected human monocyte-derived Mφs from four healthy donors with BDQr-MTB. After  
98 24 h of infection, cells were incubated for an additional 18 h with BDQ at 5 μg/mL, which  
99 corresponds to the concentration detected in the plasma of TB patients treated with BDQ  
100 (Andries et al., 2005). This concentration did not affect cell viability over an incubation period  
101 of 7 days (*Figure supplement 2*). Following treatment, we characterized the genome-wide  
102 gene expression profiles of MTB-infected Mφs by RNAseq, with DMSO-treated infected cells  
103 serving as a control. The expression of 1,495 genes was affected by BDQ (FDR < 0.05,  
104 *Figure 1A and supplementary file 1 and 2*), with 499 being up-regulated and 996 being down-  
105 regulated. We classified all 1,495 genes by performing gene-set enrichment analysis using  
106 ClueGO cluster analysis (Bindea et al., 2009). The gene set up-regulated by BDQ was  
107 significantly enriched for genes associated with glucose/phospholipid metabolism, the  
108 lysosome, and autophagy (*Figure 1B*). We observed similar results with uninfected Mφs-  
109 treated with BDQ (*Figure supplement 3A-B, supplementary file 3 and 4*), indicating that the  
110 effect of BDQ is not dependent on MTB infection.

111

112 As metabolic pathways were over-represented in our RNAseq analysis, we investigated if  
113 glycolysis is affected by BDQ treatment using the Seahorse Extracellular Flux analyzer. This  
114 assay measures the rate of proton accumulation in the extracellular medium during glycolysis  
115 (glycoPER) and can discriminate between basal glycolysis, induced glycolytic capacity (by  
116 addition of rotenone/antimycin A (Rot/AA), an inhibitor of the mitochondrial electron transport  
117 chain), and non-glycolytic acidification (by addition of the glycolytic inhibitor 2-deoxy-D-  
118 glucose (2-DG)). After incubation with BDQ, we observed a 30% decrease in basal glycolysis

119 and glycolytic capacity compared to untreated cells (*Figure 1C-D and figure supplement 3C-*  
120 *D*).

121

122 We assessed phospholipid metabolism, a pathway also identified in our ClueGO cluster  
123 analysis (*Figure 1B*). Like glycolysis, lipid metabolism affects macrophage phenotype and  
124 function (Remmerie and Scott, 2018). We analyzed the lipid profile of BDQ-treated cells using  
125 MALDI-TOF mass spectrometry. We observed an increase of phosphatidylinositols upon  
126 incubation with BDQ (*Figure 1E and figure supplement 3E*). No significant changes were  
127 observed in the levels of phosphatidylethanolamines, phosphatidylglycerols, or cardiolipins.  
128 Taken together, these data show that BDQ induced a significant metabolic reprogramming of  
129 both MTB-infected and resting M $\phi$ s.

130

### 131 **BDQ increases M $\phi$ lysosomal activity**

132 M $\phi$ s are involved in innate immunity and tissue homeostasis through their detection and  
133 elimination of microbes, debris, and dead cells, which occurs in lysosomes (Wynn et al.,  
134 2013). Lysosomes are acidic and hydrolytic organelles responsible for the digestion of  
135 macromolecules. Recent work has shown that they are also signaling platforms, which  
136 respond to nutrient and cellular stress (Lawrence and Zoncu, 2019). Functional annotations  
137 based on the KEGG database of the 1,495 genes differentially expressed genes suggested a  
138 substantial impact of BDQ treatment on lysosome function (*Figure 1B*). We identified 54  
139 differentially expressed genes, 78% of which were up-regulated, belonging to the lysosomal  
140 KEGG term (*Figure 2A*). These genes are involved in lysosome biogenesis, transport and  
141 degradation of small molecules, and lysosomal acidification. They included genes coding for  
142 components of vacuolar ATPase (V-ATPase), hydrolases, and SLC11A1 (NRAMP1), a  
143 divalent transition metal transporter involved in host resistance to pathogens, including MTB  
144 (Meilang et al., 2012).

145

146 To validate our transcriptomic data, we incubated BDQ-treated, BDQr-MTB-infected cells with  
147 LysoTracker Red DND-99, a red fluorescent probe that labels acidic organelles, and analyzed  
148 them using flow cytometry. No differences were observed between control and treatment after  
149 3 h of BDQ treatment (*Figure 2B*). However, at 18 h and 48 h post-treatment, fluorescence  
150 intensity was substantially increased in M $\phi$ s incubated with BDQ compared to DMSO-treated  
151 cells (1.7 and 5.4 times more, respectively). These results were supported by confocal  
152 microscopy, which revealed the appearance of numerous acidic compartments upon  
153 treatment (*Figure 2C*), up to 5 times more in BDQ-treated M $\phi$ s than untreated cells at 48 h  
154 post-treatment ( $p < 0.001$ , *Figure 2D*). We also observed a large number of MTB  
155 phagosomes co-localized with LysoTracker-positive compartments (*Figure 2E*).

156

157 As the expression of many genes coding for hydrolases was up-regulated upon BDQ  
158 treatment (*Figure 2A*), we tested the effect of the drug on late endosomal/lysosomal

159 proteolytic activity. BDQ-treated M $\phi$ s were incubated with DQ-Green BSA, a self-quenched  
160 non-fluorescent probe that produces brightly fluorescent peptides following hydrolysis by  
161 lysosomal proteases. At 18 h and 48 h post-treatment, we observed a dose-dependent  
162 increase in fluorescence intensity upon treatment with BDQ (up to 5.5 times more than  
163 untreated cells,  $p < 0.01$ , *Figure 2F*). Together, these data demonstrate that BDQ induces  
164 biogenesis of competent lysosomes.

165

166 Several anti-TB drugs, including INH and PZA, are known to interfere with the degradation  
167 and recycling of cellular components (Kim et al., 2012). To test whether other antibiotics  
168 might have similar effects to BDQ, we treated cells with amikacin, ethambutol, kanamycin,  
169 isoniazid, pyrazinamide, and rifampicin for 48 h and then incubated with LysoTracker (*Figure*  
170 *2G*). Only BDQ induced an increase in lysosome staining.

171

172 The capacity of BDQ to induce acidic compartments may potentiate the efficacy of other  
173 drugs, whose activity is pH dependent. In vivo studies have suggested a synergistic  
174 interaction between BDQ and PZA (Ibrahim et al., 2007), and it is commonly assumed that a  
175 low pH is required for PZA activity against MTB (Zhang and Mitchison, 2003). We thus  
176 infected M $\phi$ s with BDQr-MTB and treated them with BDQ and PZA. After 7 days of treatment,  
177 cells were lysed and bacteria counted. PZA showed moderate bactericidal activity, with 50  
178  $\mu\text{g/mL}$  PZA resulting in a 36% decrease in bacterial numbers compared to untreated cells  
179 (*Figure 2H*). We confirmed that the combination of PZA with BDQ was highly bactericidal on  
180 MTB, leading to a 83% decrease in colony forming units using 50  $\mu\text{g/mL}$  PZA. This decrease  
181 was not a result of an additive effect between the two drugs, as BDQ alone had no  
182 antibacterial activity, given that we used a drug-resistant strain of MTB. Thus, the potentiation  
183 of PZA activity by BDQ is most likely due to the effect of BDQ on the host cell, and in  
184 particular on the increase of lysosomal acidification.

185

### 186 **BDQ induces autophagy activation in M $\phi$ s**

187 Given BDQ's effect on lysosomal acidification we asked whether it promoted lysosome  
188 formation. Lysosome biogenesis is linked to the endocytic and autophagic pathways.  
189 Autophagy delivers cytoplasmic material and organelles for lysosomal degradation and is  
190 implicated in the immune response to microbes (Germic et al., 2019). We therefore tested  
191 three inhibitors of the autophagy pathway on BDQ activity: bafilomycin (BAF), which inhibits  
192 the V-ATPase; chloroquine (CQ), a lysomotropic agent which prevents endosomal  
193 acidification and impairs autophagosome fusion with lysosomes; and 3-methyladenine (3-MA)  
194 which blocks autophagosome formation by inhibiting of the type III phosphatidylinositol 3-  
195 kinases (PI-3K). We infected M $\phi$ s with BDQr-MTB and incubated the cells with BDQ in the  
196 presence or absence of the different inhibitors. After 2 days we analyzed LysoTracker  
197 staining as a read-out of lysosome activation using flow cytometry and observed that all three  
198 inhibitors prevented the increase in staining upon BDQ treatment (*Figure 3A*).

199 Microtubule-associated protein light-chain 3B (LC3B) is involved in the formation of  
200 autophagosomes and autolysosomes. We observed an increase of LC3B puncta per cell at  
201 18 h and 48 h post-BDQ treatment using confocal microscopy (*Figure 3B-C*), which was  
202 associated with the detection of lipidated LC3 (LC3-II), the form of LC3 recruited to  
203 autophagosomal membranes, and with a decrease in sequestosome 1 (SQSTM1) or p62  
204 levels (*Figure 3D-E*). p62 is a ubiquitin-binding scaffold protein, which is degraded upon  
205 autophagy induction, and which is used as a marker of autophagic flux (Liu et al., 2016).  
206 Given we have previously observed that some mycobacterial phagosomes colocalized with  
207 lysosomes in BDQ-treated cells (*Figure 2E*), we tested whether BDQ promotes MTB killing,  
208 independently of its bactericidal activity on MTB by autophagy. BDQ significantly reduced the  
209 number of bacteria (measured by CFU) in cells infected with BDQ-resistant MTB. This effect  
210 was completely inhibited by the autophagy inhibitors 3-MA and BAF (*Figure 3F*). Overall,  
211 these data show BDQ activates the autophagy pathway in human M $\phi$ s and this is involved in  
212 its anti-TB activity.

213

#### 214 **BDQ activates M $\phi$ bactericidal functions**

215 Autophagy plays numerous roles in innate immunity and in host defenses against intracellular  
216 pathogens, including MTB (Gutierrez et al., 2004). We thus asked if BDQ conferred protection  
217 to bacterial infections naturally resistant to BDQ. To test this hypothesis, we infected M $\phi$ s  
218 with two different bacterial species: a gram-positive bacterium, *Staphylococcus aureus* and a  
219 gram-negative bacterium, *Salmonella* Typhimurium. We confirmed that these two species are  
220 resistant to BDQ, even when exposed to high concentration of the drug (20  $\mu$ g/mL, *Figure*  
221 *4A*). However, when the cells were incubated with BDQ and then infected with *S. aureus* and  
222 *S. Typhimurium* for 24 h, we observed a substantial decrease in bacterial survival rates  
223 (*Figure 4B*).

224

225 To determine if autophagy is involved in this anti-bacterial activity we incubated the infected  
226 cells with the autophagy inhibitor, 3-MA, and were unable to revert the M $\phi$ s resistance to *S.*  
227 *aureus* infection upon BDQ treatment (*Figure 4C*). M $\phi$ s are professional phagocytes, which  
228 have evolved a myriad of defense strategies to contain and eradicate bacteria, such as  
229 radical formation, phagosome maturation, and metal accumulation (Weiss and Schaible,  
230 2015). Upon incubation with BDQ, we detected an increase in the amount of NO<sub>2</sub><sup>-</sup>, a stable  
231 derivative of NO, in the culture supernatant of M $\phi$ s, (*Figure 4D*). When the cells were treated  
232 with N(G)-nitro-L-arginine methyl ester (L-NAME), an inhibitor of nitric oxide (NO) synthesis,  
233 *S. aureus*-infected cells were unable to effectively control infection upon incubation with BDQ  
234 (*Figure 4E*). Thus, our results suggest that BDQ confers innate resistance to bacterial  
235 infection through different mechanisms.

236

237

238

239 **Mitochondrial functions are not affected by BDQ**

240 BDQ affects cardiac electrophysiology by prolonging the QT interval (Diacon et al., 2014) and  
241 it has been suggested that BDQ inhibits the cardiac potassium channel protein encoded by  
242 the human ether-a-go-go-related gene (hERG) (Therapeutics, 2012). Therefore, to further  
243 understand the molecular mechanisms underpinning M $\phi$  activation by BDQ we determined if  
244 human monocyte-derived M $\phi$ s expressed hERG, but were unable to detect hERG RNA by  
245 RT-qPCR (*Figure supplement 4*).

246

247 We investigated if BDQ might interfere with other activities of mitochondria. Conflicting reports  
248 suggest that BDQ inhibits the mitochondrial ATPase (Fiorillo et al., 2016; Haagsma et al.,  
249 2009). We have already shown that there were no significant differences in the amount of  
250 cardiolipin, an constituent of inner mitochondrial membranes, between BDQ-treated cells and  
251 control cells (*Figure 1E*). We quantified changes in mitochondrial membrane potential using  
252 flow cytometry in cells incubated with BDQ or with oligomycin, a positive control, which  
253 hyperpolarizes the mitochondrial membrane potential, and stained with TMRM. TMRM is a  
254 fluorescent cell-permeant dye that accumulates in active mitochondria with intact membrane  
255 potentials. No changes were observed when M $\phi$ s were incubated with the BDQ for 6 h, 24 h  
256 and 48 h (*Figure 5A*). We obtained similar results when mitochondria were stained with  
257 MitoTracker® Red FM whose accumulation in mitochondria is dependent upon membrane  
258 potential (*Figure 5B*). We also measured the oxygen consumption rate (OCR), and detected  
259 no change in basal respiration, ATP-linked respiration, maximal respiration, and non-  
260 mitochondrial respiration in cells treated with BDQ for 24 h and 48 h as compared to  
261 untreated cells (*Figure 5C and figure supplement 5*).

262

263 Mitochondrial reactive oxygen species (ROS) are involved in the regulation of several  
264 physiological and pathological processes, including autophagy (Sena and Chandel, 2012).  
265 We thus stained for mitochondrial superoxide using the MitoSOX dye in BDQ-stimulated cells.  
266 Again, we saw no difference upon antibiotic treatment (*Figure 5D*). Incubation with the  
267 antioxidant glutathione (GSH) or with its precursor N-Acetyl cysteine (NAC), which prevent  
268 the formation of mitochondrial ROS and reactive nitrogen species (RNS), did not prevent  
269 lysosome activation and the killing of *S. aureus* by BDQ (*Figure 5E*). Based on these results,  
270 it is unlikely that BDQ alters mitochondrial function in human M $\phi$ s.

271

272 **BDQ regulates lysosome activation through TFEB and calcium signaling**

273 Given that BDQ induced a lysosomal gene expression signature in M $\phi$ s, we wondered  
274 whether BDQ could activate the basic helix-loop-helix transcription factor EB (TFEB). TFEB is  
275 a master regulator of autophagy and lysosome biogenesis (Settembre et al., 2011). In resting  
276 cells, TFEB is largely cytosolic and inactive, but upon activation, it translocates into the  
277 nucleus and activates the transcription of many autophagy and lysosomal genes (Settembre  
278 et al., 2011). We therefore analyzed the cellular localization of TFEB, using confocal

279 microscopy. At 18 h post-treatment, TFEB was mainly localized in the nucleus of BDQ-treated  
280 cells (*Figure 6A-B*). The activity of TFEB is regulated by phosphorylation on specific amino  
281 acid residues, and its activation is mediated by calcineurin, an endogenous serine/threonine  
282 phosphatase, through  $\text{Ca}^{2+}$  release from the lysosome (Medina et al., 2015). In agreement  
283 with these studies, we observed an increase in intracellular  $\text{Ca}^{2+}$  concentration in M $\phi$ s treated  
284 for 18 h with BDQ (*Figure 6C*), and confirmed that this intracellular calcium accumulation was  
285 required for antibiotic-induced TFEB translocation to the nucleus and lysosomal gene  
286 expression. Upon treatment with BAPTA, a  $\text{Ca}^{2+}$  chelator, TFEB remained localized in the  
287 cytoplasm of BDQ-treated cells (*Figure 6D*), and we were unable to detect changes in the  
288 expression of a panel of lysosomal genes, previously identified as differentially expressed in  
289 M $\phi$ s incubated with BDQ (*Figure 6E*). The increased bactericidal activity against *S. aureus*  
290 was also abrogated in the presence of BAPTA (*Figure 6F*). Collectively, our data indicate that  
291 BDQ activates TFEB in M $\phi$ s and in this way modulates innate immune resistance to bacterial  
292 infection.

293

294

## 295 **Discussion**

296

297 The emergence of bacterial strains resistant to antibiotics requires the constant development  
298 of new antibiotics, which, beyond their bactericidal activity, may have a significant impact on  
299 cellular functions. Here, we have analyzed the effects of the new anti-TB drug BDQ on human  
300 M $\phi$ s. We found that in addition to its anti-bacterial activity, BDQ induces M $\phi$  cell  
301 reprogramming, increasing M $\phi$  bactericidal activity. Gene expression profiling revealed that  
302 1,495 genes were differentially expressed in MTB-infected M $\phi$ s incubated with BDQ, with  
303 over-representation of genes involved in metabolism, lysosome biogenesis, and acidification.  
304 Recent work has highlighted the role of metabolic reprogramming in controlling immunological  
305 effector functions, emphasizing the close connection between cell function and metabolism  
306 (Wang et al., 2019). In agreement with these results, we observed a substantial increase in  
307 both the number of acidic compartments and proteolytic activity of M $\phi$ s upon BDQ treatment.

308

309 BDQ is a cationic amphiphilic drug, consisting of a hydrophobic ring structure and a  
310 hydrophilic side chain with a charged cationic amine group (Diacon et al., 2012). Cationic  
311 amphiphilic drugs can accumulate in lysosomes through ion trapping (de Duve et al., 1974).  
312 At neutral pH, they passively diffuse across cell and organelle membranes but when they  
313 enter the luminal space of acidic compartments such as lysosomes, the amine group ionizes  
314 and becomes membrane-impermeable (MacIntyre and Cutler, 1988). Such lysosomotropic  
315 compounds usually increase the lysosomal pH and thus decrease lysosomal enzyme activity  
316 (Kazmi et al., 2013). However, our results reveal instead that BDQ triggers lysosomal  
317 activation, up-regulating the expression of genes coding for hydrolases and for subunits of the



318 lysosomal proton pump v-ATPase. Consistent with these observations, we observed that  
319 BDQ-treated cells significantly increase their ability to degrade DQ BSA.

320

321 Pre-clinical studies have shown that BDQ may induce phospholipidosis, potentially explaining  
322 some of the drug's observed toxicities (Diacon et al., 2012). Phospholipidosis, which is  
323 characterized by the accumulation of phospholipids in lysosomes, resulting in impaired  
324 lysosome function, is common upon treatment with cationic amphiphilic compounds  
325 (Shayman and Abe, 2013). Various phospholipid species have been described including  
326 sphingomyelin, phosphatidylcholine, phosphatidylethanolamine, phosphatidylserine,  
327 lysobisphosphatidic acid, and cholesterol (Reasor, 1984; Yamamoto et al., 1971a; Yamamoto  
328 et al., 1971b; Yoshikawa, 1991). In BDQ-treated Mφs, we only observed an increase in the  
329 amount of phosphatidylinositol and phosphatidylinositol-4-phosphate. The quantity of  
330 cardiolipin, phosphatidylethanolamine, and phosphatidylglycerol remained unchanged upon  
331 treatment. These observations do not indicate lysosomal dysfunction, but rather a targeted  
332 regulation of certain phospholipids by BDQ. In accordance with this idea, 28 genes involved  
333 in phospholipid metabolism were differentially expressed in BDQ-treated Mφs.  
334 Phosphatidylinositol phosphates regulate many cellular functions, including endosomal  
335 trafficking, endoplasmic reticulum (ER) export, autophagy, and phagosome-lysosome fusion  
336 (De Matteis et al., 2013; Levin et al., 2017). These phospholipids may thus be involved in the  
337 increase of autophagy and mycobacterial phagosome-lysosome fusion upon BDQ treatment.  
338 Consistent with this hypothesis, recent work has shown that BDQ accumulates in host cell  
339 lipid droplets and is transferred to MTB as the droplets are consumed by the bacteria,  
340 enhancing MTB killing (Greenwood et al., 2019).

341

342 Lysosomes are both digestive organelles of the endocytic and autophagic pathways and  
343 signaling hubs involved in nutrient sensing, cell growth and differentiation, transcriptional  
344 regulation, and metabolic homeostasis (Lamming and Bar-Peled, 2019; Lawrence and Zoncu,  
345 2019). In response to nutrients and growth factors, the mechanistic target of the rapamycin  
346 complex 1 (mTORC1) is recruited and activated at the lysosomal surface, where it promotes  
347 ribosomal biogenesis, translation, and biosynthesis of lipids (Lamming and Bar-Peled, 2019;  
348 Lawrence and Zoncu, 2019). mTORC1 binds to and phosphorylates TFEB, resulting in its  
349 cytosolic sequestration (Roczniak-Ferguson et al., 2012; Settembre et al., 2012). Upon  
350 starvation or lysosomal stress, mTORC1 is released from the lysosomal membrane and  
351 becomes inactive (Lamming and Bar-Peled, 2019; Lawrence and Zoncu, 2019). The release  
352 of lysosomal  $Ca^{2+}$  activates the phosphatase calcineurin, which de-phosphorylates TFEB and  
353 promotes its nuclear translocation (Medina et al., 2015). TFEB then binds to CLEAR  
354 (coordinated lysosomal expression and regulation) elements within the promoters of genes  
355 involved in autophagy and lysosomal biogenesis and activates their expression (Lamming  
356 and Bar-Peled, 2019; Lawrence and Zoncu, 2019). We found that TFEB translocates from the  
357 cytoplasm to the nucleus in a calcium-dependent manner in BDQ-treated cells, with the

358 concomitant up-regulation of 85 genes containing CLEAR elements 18 h after incubation with  
359 the drug.

360

361 A striking feature of BDQ-treated M $\phi$ s is their capacity to control pathogenic bacterial  
362 infection. BDQ enhances M $\phi$  innate defense mechanisms, including induction of anti-  
363 microbial effectors such as nitric oxide, phagosome-lysosome fusion, and autophagy. Other  
364 anti-TB drugs have been described to regulate autophagy. INH and PZA promote autophagy  
365 activation and phagosomal maturation in MTB-infected murine M $\phi$ s (Kim et al., 2012) and this  
366 process was suggested to be essential for antimycobacterial drug action and for dampening  
367 proinflammatory cytokines (Kim et al., 2012). However, a bactericidal effect of INH and PZA  
368 could not be excluded as a drug-sensitive MTB strain was used (Kim et al., 2012). In our  
369 system, we did not detect increased autophagy in cells treated with INH, which may also be  
370 due to differences in the autophagy response in murine and human M $\phi$ s. Altogether, we  
371 demonstrate that BDQ is able to boost the innate defenses of human cells.

372

373 A growing number of pathogenic bacteria are becoming resistant to antibiotics, making their  
374 use less effective. In addition to the development of “classical” drugs targeting key factors in  
375 bacterial physiology, host-directed therapy (HDT) has emerged as approach that could be  
376 used in adjunct with existing or future antibiotics (Machelart et al., 2017). Targeting the host to  
377 improve treatment has a number advantages. In particular, HDT is less prone to the  
378 development of resistance and it could be used to reduce disease severity and mortality. For  
379 example, metformin, an FDA-approved drug for type II diabetes, increases the production of  
380 mitochondrial reactive oxygen species and stimulates phagosome-lysosome fusion by  
381 activating the 5'-adenosine monophosphate-activated protein kinase (AMPK) (Singhal et al.,  
382 2014), and recent studies suggest that metformin provides better outcomes in TB patients,  
383 especially those with diabetes mellitus (Yew et al., 2019). Pathogens manipulate host-  
384 signaling pathways to subvert innate and adaptive immunity. It might thus be possible to  
385 reprogram the host immune system to better control or even kill bacteria. For instance, MTB  
386 has developed several strategies to counteract autophagy, including the product of the  
387 enhanced intracellular survival (Eis) gene, which limits ROS generation (Shin et al., 2010).  
388 Our results clearly show that BDQ can bypass these escape mechanisms and allow more  
389 effective control of bacterial infection. We also showed that BDQ potentiates the activity of  
390 other anti-TB drugs, independently of its bactericidal activity on MTB. Hence, our work opens  
391 new avenues for downstream evaluation of the potential use of BDQ as a potent drug in HDT.

392

393

394

395

396

397

398 **Materials and methods**

399

400 **Ethics Statement**

401 Buffy coats were obtained from healthy donors after informed consent. The blood collection  
402 protocols were approved by both the French Ministry of Research and a French Ethics  
403 Committee. The blood collection was carried out in accordance with these approved protocols  
404 by the Etablissement Français du Sang (EFS).

405

406 **M $\Phi$ , MTB and infection**

407 Blood mononuclear cells were isolated from buffy coats by Lymphocytes Separation Medium  
408 centrifugation (Eurobio, Les Ulis, France). CD14<sup>+</sup> monocytes were isolated by positive  
409 selection using CD14 microbeads (Miltenyi Biotec, Bergisch Gladbach, Germany) and were  
410 allowed to differentiate into M $\phi$ s in the presence of granulocyte macrophage colony-  
411 stimulating factor (GM-CSF, 20 ng/mL; Miltenyi Biotec) over a 6-day period. To exclude  
412 potential differences due to the MTB bacillary load between treated and untreated cells, M $\phi$ s  
413 were infected with BDQ-resistant MTB strain H37Rv (BDQr-MTB) expressing green-  
414 fluorescent protein (GFP). Briefly, exponentially growing MTB carrying the pEGFP plasmid  
415 (Tailleux et al., 2003) was plated during 4 weeks on Middlebrook 7H11 agar supplemented  
416 with OADC (Becton Dickinson) and containing 0.3  $\mu$ g/mL BDQ. Some clones were then  
417 selected. Resistance to BDQ was confirmed (i) by bacterial culture in Middlebrook 7H9 Broth  
418 (Becton Dickinson) supplemented with albumin-dextrose-catalase (ADC, Becton Dickinson)  
419 and 0.3  $\mu$ g/mL BDQ, and (ii) by confirming the mutation in the ATP synthase gene. The *atpE*  
420 gene was PCR-amplified using primers (forward: 5- TCGTGTTTCATCCTGATCTCCA-3;  
421 reverse: 5-GACAATCGCGCTCACTTAC-3) and the PCR products were sent to Eurofins for  
422 sequencing. All the selected mutants carried a mutation in the *atpE* gene as described  
423 previously (Andries et al., 2005). Only mutant with similar growth rate (in liquid medium and in  
424 M $\phi$ s) as the wild type strain has been used for further experiments. Before infection, bacteria  
425 were washed and resuspended in 1 mL PBS. Clumps were disassociated by 50 passages  
426 through a needle, and then allowed to sediment for 5 min. The density of bacteria in the  
427 supernatant was verified by measuring the OD600 and aliquot volumes defined to allow 0.5  
428 bacterium-per-cell infections. After 2 h of incubation at 37 °C, infected cells were thoroughly  
429 washed in RPMI 1640 to remove extracellular bacteria and were incubated in fresh medium.

430

431 **RNA isolation, library preparation and sequencing**

432 Total RNA from M $\phi$ s was extracted using QIAzol lysis reagent (Qiagen, Hilden, Germany)  
433 and purified over RNeasy columns (Qiagen). The quality of all samples was assessed with an  
434 Agilent 2100 bioanalyzer (Agilent Technologies, Santa Clara, California) to verify RNA  
435 integrity. Only samples with good RNA yield and no RNA degradation (ratio of 28S to 18S,  
436 >1.7; RNA integrity number, >9) were used for further experiments. cDNA libraries were  
437 prepared with the Illumina TruSeq RNA Sample Preparation Kit v2 and were sequenced on

438 an Illumina HiSeq 2500 at the CHU Sainte-Justine Integrated Centre for Pediatric Clinical  
439 Genomics (Montreal, Canada).

440 STAR v2.5.0b (Dobin et al., 2013) was used to map RNA-seq reads to the hg38 reference  
441 genome and quantify gene expression (option-quantMode GeneCounts) by counting the  
442 fragments overlapping the Ensembl genes (GRCh38 v. 83). Differential expression analysis  
443 was performed using a generalized linear model with the R Bioconductor package DESeq2  
444 v1.18.1 (Love et al., 2014) on the 12,584 genes with at least one count-per-million (CPM)  
445 read in at least four samples. The model formula used in DESeq2 (~ Donor + Infection +  
446 Infection:Donor + Infection:Treatment + Donor:Treatment) contained: the main effects for  
447 Donor and Infection, interactions of Donor with Infection and Treatment to adjust for various  
448 responses to infection and treatment between donors, and a nested interaction of Infection  
449 with Treatment because we were interested in the infection-status-specific treatment effects.  
450 The latter was used to extract differentially expressed genes between treated and untreated  
451 samples under the infected and uninfected conditions. P-values were adjusted for multiple  
452 comparisons using the Benjamini-Hochberg method producing an adjusted P-value or false-  
453 discovery rate (FDR).

454 Gene ontology (GO) enrichment analyses were performed using the Cytoscape app ClueGO  
455 (version 2.5.3) (Bindea et al., 2009). The following parameters were used: only pathways with  
456  $pV \leq 0.01$ , Minimum GO level = 3, Maximum GO level = 8, Min GO family > 1, minimum  
457 number of genes associated to GO term = 5, and minimum percentage of genes associated to  
458 GO term = 8. Enrichment p-values were calculated using a hypergeometric test (p-value <  
459 0.05, Bonferroni corrected).

460

#### 461 **Measurement of glycolysis**

462 Measurement of glycolysis was done using the Glycolytic rate assay kit (Seahorse, Agilent  
463 Technologies), following the manufacturer's protocol. Briefly, cells were seeded in Xe96  
464 plates treated with BDQ for 24 h. The cells were then incubated in the assay medium  
465 (Seahorse XF Base Medium without phenol, 2mM glutamine, 10 mM glucose, 1 mM pyruvate  
466 and 5.0 mM HEPES) at 37°C, during 1 h. Extracellular acidification rate (ECAR, milli pH/min)  
467 and oxygen consumption rate (OCR, pmol/min) were measured using the Seahorse  
468 Bioscience XFe96 Analyzer.

469

#### 470 **Lipidomic**

471 Cells were treated with BDQ during 18 h and then lysed in water during 10 min at 37°C.  
472 Samples were heated at 90°C during 40 min in order to inactivate MTB, and were then  
473 washed three times to remove salts and contaminants that could preclude the analysis. Prior  
474 to mass spectrometry analysis, the 2,5-dihydroxybenzoic acid (Sigma-Aldrich, Saint-Louis,  
475 Missouri) matrix was added at a final concentration of 10 mg/mL in a chloroform/methanol  
476 mixture at a 90:10 (v/v) ratio; 0.4  $\mu$ L of a cell solution at a concentration of  $2 \times 10^5$  to  $2 \times 10^6$   
477 cells/mL, corresponding to ~100–1000 cells per well of the MALDI target plate (384 Opti-TOF

478 123 mm × 84 mm, AB Sciex), and 0.6 µL of the matrix solution were deposited on the MALDI  
479 target plate, mixed with a micropipette, and left to dry gently. MALDI-TOF MS analysis was  
480 performed on a 4800 Proteomics Analyzer (with TOF-TOF Optics, Applied Biosystems,  
481 Foster City, California) using the reflectron mode. Samples were analyzed operating at 20 kV  
482 in the negative and positive ion mode. Mass spectrometry data were analyzed using Data  
483 Explorer version 4.9 from Applied Biosystems.

484

#### 485 **Staining and quantification of acidic compartments**

486 Cells were incubated with LysoTracker DND-99 (100 nM; Thermo Fisher, Waltham,  
487 Massachusetts) during 1 h at 37°C. Cells were then fixed with 4% paraformaldehyde at room  
488 temperature (RT) for 1 h. Fluorescence was analyzed using a CytoFLEX Flow Cytometer  
489 (Beckman Coulter, Brea, California). More than 10,000 events per sample were recorded.  
490 The analysis was performed using the FlowJo software.

491 LysoTracker staining was also analyzed using a Leica TCS SP5 Confocal System. Briefly,  
492 cells were washed twice with PBS after incubation with LysoTracker DND-99 (1 µM), fixed  
493 with 4% paraformaldehyde for 1 h at RT, stained with DAPI (1 µg/mL, Thermo Fisher) during  
494 10 min mounted on a glass slide using Fluoromount mounting medium (Thermo Fisher).  
495 Quantification of LysoTracker staining was performed using Icy software.

496

#### 497 **Quantification of lysosomal proteolytic activity**

498 Mφs were activated with heat-killed MTB and treated with BDQ during 18 h or 48 h. Cells  
499 were then incubated with DQ-Green BSA (10 µg/mL; Thermo Fisher) for 1 h at 37°C. The  
500 hydrolysis of the DQ-Green BSA by lysosomal proteases produces brightly fluorescent  
501 peptides. Cells were washed and incubated further in culture medium for 3 h to ensure that  
502 DQ BSA had reached the lysosomal compartment. Cells were detached and were fixed with  
503 4% paraformaldehyde and the fluorescence was analyzed using a CytoFLEX Flow Cytometer  
504 (Beckman Coulter).

505

#### 506 **Determination of bacterial counts**

507 Mφs were lysed in distilled water with 0.1% Triton X-100. MTB was enumerated as previously  
508 described (Tailleux et al., 2003) and plated on 7H11. CFUs were scored after three weeks at  
509 37 °C. *S. aureus* and *S. Typhimurium* were plated on Luria-Bertani agar and CFUs were  
510 counted after 1 day at 37°C.

511

#### 512 **Indirect Immunofluorescence**

513 Mφs ( $4 \times 10^5$  cells/mL) were grown on 12-mm circular coverslips in 24-well tissue culture  
514 plates for 24 h in cell culture medium, followed by BDQ treatment. Cells were fixed with 4%  
515 paraformaldehyde for 1 h at RT, and were then incubated for 30 min in 1% BSA (Sigma-  
516 Aldrich) and 0.075% saponin (Sigma-Aldrich) in PBS, to block nonspecific binding and to  
517 permeabilize the cells. Cells were incubated with anti-LC3 (MBL, Woburn, Massachusetts)

518 during 2 h at RT. Alternatively, cells were fixed with cold methanol for 5 min, and were then  
519 incubated for 10 min in PBS containing 0.5% saponin. Cells were stained with anti-TFEB  
520 (Thermo Fisher) overnight at 4°C. Cells were washed and incubated with Alexa Fluor 555  
521 secondary antibody (Thermo Fisher) for 2 h. Nuclei were stained with DAPI (1 µg/mL) during  
522 10 min. After labeling, coverslips were set in Fluoromount G medium containing 1 µg/ml 4',6-  
523 diamidino-2-phenylindole (DAPI) (SouthernBiotech, Birmingham, Alabama) on microscope  
524 slides. Fluorescence was analyzed using Leica TCS SP5. Quantification of TFEB staining  
525 was performed using Icy software. LC3B puncta were analysed by confocal microscopy and  
526 quantified using ImageJ. Infected cells were manually segmented, thresholded and puncta  
527 counted using Analyze Particles. Dot plots represent the mean values of at least 83 cells from  
528 2 donors. Error bars depict the SD.

529

### 530 **Quantitative reverse transcription PCR (RT-qPCR)**

531 Reverse transcription of mRNA to cDNA was done using SuperScript III Reverse  
532 Transcriptase (Thermo Fisher) followed by amplification of cDNA using Power SYBR Green  
533 PCR Master Mix (Thermo Fisher). The following primers were used: FABP5 (forward: 5-  
534 GGAAGGAGAGCACGATAACAAGA-3; reverse: 5'-GGTGGCATTGTTCATGACACA-3),  
535 hERG (forward: 5-GGGCTCCATCGAGATCCT-3; reverse: 5-AGGCCTTGCATACAGGTTCA-  
536 3), RPL24 (forward: 5-CAAAGAAAAGAACCCGCCGA-3; reverse: 5-  
537 TCGAAACTGGGGAACCATGA-3), SCARB1 (forward: 5-CTTGTTTCTCTCCCATCCTCA-3;  
538 reverse: 5-GAGTGTGCCTCCTGGTTAG-3), and TRPM2 (forward: 5'-  
539 ACGTGCTCATGGTGGACTTC-3'; reverse: 5'-AGGGTCATAGAAGAGCTGCC-3'). Reactions  
540 were performed using a StepOnePlus Real-Time PCR System Thermal Cycling block  
541 (Applied Biosystems). The relative gene expression levels were assessed according to the 2<sup>-</sup>  
542  $\Delta C_t$  method (Pfaffl, 2001).

543

### 544 **Western blot analysis**

545 Cells were lysed with RIPA buffer (Thermo Fisher) containing protease inhibitor cocktails  
546 (Roche) and stored at -80°C. Protein concentration was determined using the BCA protein  
547 assay kit (Thermo Fisher) according to the manufacturer instructions. 20 µg of total protein  
548 were loaded on a NUPAGE 4–12% Bis-Tris polyacrylamide gel (Thermo Fisher) and  
549 transferred to PVDF membranes (iBlot, Thermo Fisher). The membranes were blocked with  
550 TBS-0.1% Tween20, 5% non-fat dry milk for 30 min at RT and incubated overnight with  
551 primary antibodies against  $\alpha$ - $\beta$ -Tubulin, p-62 (Cell Signaling) and LC3 (Abcam, Cambridge,  
552 United Kingdom). Membranes were washed in TBS-Tween and incubated with secondary  
553 HRP-conjugated antibody (GE Healthcare, Chicago, Illinois) at RT for 1 h. Membranes were  
554 washed and exposed to SuperSignal West Femto Maximum Sensitivity Substrate (Thermo  
555 Fisher). Detection and quantification of band intensities was performed using Azure Imager  
556 C400 (Azure Biosystems, Dublin, California) and ImageJ software (version 1.51).

557

558 **Infection *S. aureus* & *S. Typhimurium***

559 *S. aureus* and *S. Typhimurium* were grown in Luria-Bertani broth. Bacteria were washed 3  
560 times and resuspended in PBS. The density of bacteria was estimated by measuring the  
561 OD<sub>600</sub>. Cells were then infected at a multiplicity of infection of 2:1. After 1 h of infection, cells  
562 were extensively washed and incubated for 1 h in culture medium supplemented with  
563 gentamicin (100 µg/mL). After washing, cells were cultured with different concentrations of  
564 BDQ and gentamicin (5 µg/mL).

565

566 **Measurement of nitric oxide**

567 NO was measured by Griess reaction assay (Promega, Madison, Wisconsin) according to the  
568 manufacturer's instructions. Briefly cell culture supernatants were incubated with N-1-  
569 naphthylethylenediamine dihydrochloride during 10 min followed by additional 10 min with N-1-  
570 naphthylethylenediamine dihydrochloride. The absorbance was measured at 520 nm.

571

572 **Mitochondrial membrane potential**

573 Cells were stained with Image-IT TMRM (10 nM, Thermo Fischer) during 30 min at 37°C or  
574 with MitoTracker Deep Red (100nM, Thermo Fisher) during 45 min at 37°C. Cells were  
575 washed in PBS and detached from culture plates with 0.05% Trypsin-EDTA. Fluorescence  
576 was analyzed using a CytoFLEX Flow Cytometer (Beckman Coulter).

577

578 **Measurement of oxygen consumption**

579 The oxygen consumption rate was measured using the XF Cell Mito Stress Test Kit  
580 (Seahorse, Agilent Technologies) according to the manufacturer's protocol. Briefly, cells were  
581 seeded in Xe96 plates and treated with BDQ for 24h. The test was performed by adding  
582 oligomycin (1 µM), FCCP (1 µM), rotenone and antimycin (0.5 µM) at the indicated time  
583 points.

584

585 **Mitochondrial ROS assay**

586 Cells were incubated with MitoSOX Red (5 µM, Thermo Fisher) during 10 min at 37°C. Cells  
587 were washed in PBS and detached from culture plates with 0.05% Trypsin-EDTA.  
588 Fluorescence was analyzed using a CytoFLEX Flow Cytometer (Beckman Coulter).

589

590 **Calcium measurement assay**

591 Cells were treated with BDQ for 1 to 18 h, then labeled with Fluo-8 AM (4 µM, Abcam) during  
592 1 h. Cells were washed twice with PBS and fluorescence was analyzed using FLUOstar  
593 Omega (BMG Labtech, Ortenberg, Germany).

594

595 **Quantification and statistical analysis**

596 Data are expressed as means ± standard deviations (SD). Statistical analyses were  
597 performed with Prism software (GraphPad Software Inc.), using the t test and one-way

598 analysis of variance (ANOVA) as indicated in the figure legends. A p value of <0.05 was  
599 considered to be significant.

600

#### 601 **Data availability**

602 The raw fastq files have been deposited in NCBI's Gene Expression Omnibus (Edgar et al.,  
603 2002) and are accessible through GEO Series accession number GSE133145  
604 (<https://www.ncbi.nlm.nih.gov/geo/query/acc.cgi?acc=GSE133145>, token: wnkrmgicqzajxyl).

605

606

#### 607 **Acknowledgments**

608

609 We thank Olivier Neyrolles for reading the manuscript and helpful discussion. We gratefully  
610 acknowledge the UTechS Cytometry and Biomarkers and the UTechS Photonic Bioluminescence  
611 (Imagopole) Citech of Institut Pasteur (Paris, France) as well as the France–Bioluminescence  
612 infrastructure network supported by the French National Research Agency (ANR-10–INSB–  
613 04; Investments for the Future) for support in conducting this study, in particular P.H.  
614 Commere for help with flow cytometry. We also thank Charles Privé (CHU Sainte-Justine  
615 Integrated Centre for Pediatric Clinical Genomics, Montreal, Canada) for their technical  
616 support.

617

618

#### 619 **Additional information**

620

#### 621 **Competing interests**

622 The authors declare that no competing interests exist.

623

#### 624 **Additional files**

625

626 **Supplementary file 1. Up-regulated genes in rBDQ-MTB-infected Mφs upon BDQ**  
627 **treatment.** Related to *Figure 1*. FDR<0.05.

628

629 **Supplementary file 2. Down-regulated genes in rBDQ-MTB-infected Mφs upon BDQ**  
630 **treatment.** Related to *Figure 1*. FDR<0.05.

631

632 **Supplementary file 3. Up-regulated genes in uninfected Mφs upon BDQ treatment.**  
633 Related to *Figure supplement 3*. FDR<0.05.

634

635 **Supplementary file 4. Down-regulated genes in uninfected Mφs upon BDQ treatment.**  
636 Related to *Figure supplement 3*. FDR<0.05.

637



638

639 **References**

640

641 Agal, S., Bajjal, R., Pramanik, S., Patel, N., Gupte, P., Kamani, P., and Amarapurkar, D.  
642 (2005). Monitoring and management of antituberculosis drug induced hepatotoxicity. *J*  
643 *Gastroenterol Hepatol.* 20(11), 1745-1752. DOI: 10.1111/j.1440-1746.2005.04048.x.

644 Andries, K., Verhasselt, P., Guillemont, J., Gohlmann, H.W., Neefs, J.M., Winkler, H., Van  
645 Gestel, J., Timmerman, P., Zhu, M., Lee, E., et al. (2005). A diarylquinoline drug active on the  
646 ATP synthase of *Mycobacterium tuberculosis*. *Science.* 307(5707), 223-227. DOI:  
647 10.1126/science.1106753.

648 Armstrong, J.A., and Hart, P.D. (1975). Phagosome-lysosome interactions in cultured  
649 macrophages infected with virulent tubercle bacilli. Reversal of the usual nonfusion pattern  
650 and observations on bacterial survival. *J Exp Med.* 142(1), 1-16. DOI: 10.1084/jem.142.1.1.

651 Bi, W., Zhu, L., Wang, C., Liang, Y., Liu, J., Shi, Q., and Tao, E. (2011). Rifampicin inhibits  
652 microglial inflammation and improves neuron survival against inflammation. *Brain Res.* 1395,  
653 12-20. DOI: 10.1016/j.brainres.2011.04.019.

654 Bindea, G., Mlecnik, B., Hackl, H., Charoentong, P., Tosolini, M., Kirilovsky, A., Fridman,  
655 W.H., Pages, F., Trajanoski, Z., and Galon, J. (2009). ClueGO: a Cytoscape plug-in to  
656 decipher functionally grouped gene ontology and pathway annotation networks.  
657 *Bioinformatics.* 25(8), 1091-1093. DOI: 10.1093/bioinformatics/btp101.

658 Biraro, I.A., Egesa, M., Kimuda, S., Smith, S.G., Toulza, F., Levin, J., Joloba, M., Katamba,  
659 A., Cose, S., Dockrell, H.M., et al. (2015). Effect of isoniazid preventive therapy on immune  
660 responses to mycobacterium tuberculosis: an open label randomised, controlled, exploratory  
661 study. *BMC Infect Dis.* 15, 438. DOI: 10.1186/s12879-015-1201-8.

662 Cambier, C.J., Falkow, S., and Ramakrishnan, L. (2014). Host evasion and exploitation  
663 schemes of *Mycobacterium tuberculosis*. *Cell.* 159(7), 1497-1509. DOI:  
664 10.1016/j.cell.2014.11.024.

665 Cox, H.S., Morrow, M., and Deutschmann, P.W. (2008). Long term efficacy of DOTS  
666 regimens for tuberculosis: systematic review. *BMJ.* 336(7642), 484-487. DOI:  
667 10.1136/bmj.39463.640787.BE.

668 de Duve, C., de Barsey, T., Poole, B., Trouet, A., Tulkens, P., and Van Hoof, F. (1974).  
669 Commentary. Lysosomotropic agents. *Biochem Pharmacol.* 23(18), 2495-2531.

670 De Matteis, M.A., Wilson, C., and D'Angelo, G. (2013). Phosphatidylinositol-4-phosphate: the  
671 Golgi and beyond. *Bioessays.* 35(7), 612-622. DOI: 10.1002/bies.201200180.

672 Diacon, A.H., Donald, P.R., Pym, A., Grobusch, M., Patientia, R.F., Mahanyele, R.,  
673 Bantubani, N., Narasimooloo, R., De Marez, T., van Heeswijk, R., et al. (2012). Randomized  
674 pilot trial of eight weeks of bedaquiline (TMC207) treatment for multidrug-resistant  
675 tuberculosis: long-term outcome, tolerability, and effect on emergence of drug resistance.  
676 *Antimicrob Agents Chemother.* 56(6), 3271-3276. DOI: 10.1128/AAC.06126-11.

677 Diacon, A.H., Pym, A., Grobusch, M.P., de los Rios, J.M., Gotuzzo, E., Vasilyeva, I.,  
678 Leimane, V., Andries, K., Bakare, N., De Marez, T., et al. (2014). Multidrug-resistant  
679 tuberculosis and culture conversion with bedaquiline. *N Engl J Med.* 371(8), 723-732. DOI:  
680 10.1056/NEJMoa1313865.

681 Dobin, A., Davis, C.A., Schlesinger, F., Drenkow, J., Zaleski, C., Jha, S., Batut, P., Chaisson,  
682 M., and Gingeras, T.R. (2013). STAR: ultrafast universal RNA-seq aligner. *Bioinformatics.*  
683 29(1), 15-21. DOI: 10.1093/bioinformatics/bts635.

684 Edgar, R., Domrachev, M., and Lash, A.E. (2002). Gene Expression Omnibus: NCBI gene  
685 expression and hybridization array data repository. *Nucleic Acids Res.* 30(1), 207-210. DOI:  
686 10.1093/nar/30.1.207.

687 Fiorillo, M., Lamb, R., Tanowitz, H.B., Cappello, A.R., Martinez-Outschoorn, U.E., Sotgia, F.,  
688 and Lisanti, M.P. (2016). Bedaquiline, an FDA-approved antibiotic, inhibits mitochondrial  
689 function and potently blocks the proliferative expansion of stem-like cancer cells (CSCs).  
690 *Aging (Albany NY).* 8(8), 1593-1607. DOI: 10.18632/aging.100983.

691 Germic, N., Frangez, Z., Yousefi, S., and Simon, H.U. (2019). Regulation of the innate  
692 immune system by autophagy: monocytes, macrophages, dendritic cells and antigen  
693 presentation. *Cell Death Differ.* 26(4), 715-727. DOI: 10.1038/s41418-019-0297-6.

694 Greenwood, D.J., Dos Santos, M.S., Huang, S., Russell, M.R.G., Collinson, L.M., MacRae,  
695 J.I., West, A., Jiang, H., and Gutierrez, M.G. (2019). Subcellular antibiotic visualization  
696 reveals a dynamic drug reservoir in infected macrophages. *Science.* 364(6447), 1279-1282.  
697 DOI: 10.1126/science.aat9689.

698 Gutierrez, M.G., Master, S.S., Singh, S.B., Taylor, G.A., Colombo, M.I., and Deretic, V.  
699 (2004). Autophagy is a defense mechanism inhibiting BCG and *Mycobacterium tuberculosis*  
700 survival in infected macrophages. *Cell.* 119(6), 753-766. DOI: 10.1016/j.cell.2004.11.038.

701 Haagsma, A.C., Abdillahi-Ibrahim, R., Wagner, M.J., Krab, K., Vergauwen, K., Guillemont, J.,  
702 Andries, K., Lill, H., Koul, A., and Bald, D. (2009). Selectivity of TMC207 towards  
703 mycobacterial ATP synthase compared with that towards the eukaryotic homologue.  
704 *Antimicrob Agents Chemother.* 53(3), 1290-1292. DOI: 10.1128/AAC.01393-08.

705 Ibrahim, M., Andries, K., Lounis, N., Chauffour, A., Truffot-Pernot, C., Jarlier, V., and Veziris,  
706 N. (2007). Synergistic activity of R207910 combined with pyrazinamide against murine  
707 tuberculosis. *Antimicrob Agents Chemother.* 51(3), 1011-1015. DOI: 10.1128/AAC.00898-06.

708 Kazmi, F., Hensley, T., Pope, C., Funk, R.S., Loewen, G.J., Buckley, D.B., and Parkinson, A.  
709 (2013). Lysosomal sequestration (trapping) of lipophilic amine (cationic amphiphilic) drugs in  
710 immortalized human hepatocytes (Fa2N-4 cells). *Drug Metab Dispos.* 41(4), 897-905. DOI:  
711 10.1124/dmd.112.050054.

712 Kim, J.J., Lee, H.M., Shin, D.M., Kim, W., Yuk, J.M., Jin, H.S., Lee, S.H., Cha, G.H., Kim,  
713 J.M., Lee, Z.W., et al. (2012). Host cell autophagy activated by antibiotics is required for their  
714 effective antimycobacterial drug action. *Cell Host Microbe.* 11(5), 457-468. DOI:  
715 10.1016/j.chom.2012.03.008.

716 Koul, A., Dendouga, N., Vergauwen, K., Molenberghs, B., Vranckx, L., Willebrords, R., Ristic,  
717 Z., Lill, H., Dorange, I., Guillemont, J., et al. (2007). Diarylquinolines target subunit c of  
718 mycobacterial ATP synthase. *Nat Chem Biol.* 3(6), 323-324. DOI: 10.1038/nchembio884.

719 Lamming, D.W., and Bar-Peled, L. (2019). Lysosome: The metabolic signaling hub. *Traffic.*  
720 20(1), 27-38. DOI: 10.1111/tra.12617.

721 Lawrence, R.E., and Zoncu, R. (2019). The lysosome as a cellular centre for signalling,  
722 metabolism and quality control. *Nat Cell Biol.* 21(2), 133-142. DOI: 10.1038/s41556-018-  
723 0244-7.

724 Levin, R., Hammond, G.R., Balla, T., De Camilli, P., Fairn, G.D., and Grinstein, S. (2017).  
725 Multiphasic dynamics of phosphatidylinositol 4-phosphate during phagocytosis. *Mol Biol Cell.*  
726 28(1), 128-140. DOI: 10.1091/mbc.E16-06-0451.

727 Liu, W.J., Ye, L., Huang, W.F., Guo, L.J., Xu, Z.G., Wu, H.L., Yang, C., and Liu, H.F. (2016).  
728 p62 links the autophagy pathway and the ubiquitin-proteasome system upon ubiquitinated  
729 protein degradation. *Cell Mol Biol Lett.* 21, 29. DOI: 10.1186/s11658-016-0031-z.

730 Love, M.I., Huber, W., and Anders, S. (2014). Moderated estimation of fold change and  
731 dispersion for RNA-seq data with DESeq2. *Genome Biol.* 15(12), 550. DOI: 10.1186/s13059-  
732 014-0550-8.

733 Machelart, A., Song, O.R., Hoffmann, E., and Brodin, P. (2017). Host-directed therapies offer  
734 novel opportunities for the fight against tuberculosis. *Drug Discov Today.* 22(8), 1250-1257.  
735 DOI: 10.1016/j.drudis.2017.05.005.

736 MacIntyre, A.C., and Cutler, D.J. (1988). Role of lysosomes in hepatic accumulation of  
737 chloroquine. *J Pharm Sci.* 77(3), 196-199.

738 Manca, C., Koo, M.S., Peixoto, B., Fallows, D., Kaplan, G., and Subbian, S. (2013). Host  
739 targeted activity of pyrazinamide in Mycobacterium tuberculosis infection. *PLoS One.* 8(8),  
740 e74082. DOI: 10.1371/journal.pone.0074082.

741 Medina, D.L., Di Paola, S., Peluso, I., Armani, A., De Stefani, D., Venditti, R., Montefusco, S.,  
742 Scotto-Rosato, A., Prezioso, C., Forrester, A., et al. (2015). Lysosomal calcium signalling  
743 regulates autophagy through calcineurin and TFEB. *Nat Cell Biol.* 17(3), 288-299. DOI:  
744 10.1038/ncb3114.

745 Meilang, Q., Zhang, Y., Zhang, J., Zhao, Y., Tian, C., Huang, J., and Fan, H. (2012).  
746 Polymorphisms in the SLC11A1 gene and tuberculosis risk: a meta-analysis update. *Int J*  
747 *Tuberc Lung Dis.* 16(4), 437-446. DOI: 10.5588/ijtld.10.0743.

748 Pfaffl, M.W. (2001). A new mathematical model for relative quantification in real-time RT-  
749 PCR. *Nucleic Acids Res.* 29(9), e45. DOI: 10.1093/nar/29.9.e45.

750 Reasor, M.J. (1984). Phospholipidosis in the alveolar macrophage induced by cationic  
751 amphiphilic drugs. *Fed Proc.* 43(11), 2578-2581.

752 Remmerie, A., and Scott, C.L. (2018). Macrophages and lipid metabolism. *Cell Immunol.* 330,  
753 27-42. DOI: 10.1016/j.cellimm.2018.01.020.

754 Rocznik-Ferguson, A., Petit, C.S., Froehlich, F., Qian, S., Ky, J., Angarola, B., Walther, T.C.,  
755 and Ferguson, S.M. (2012). The transcription factor TFEB links mTORC1 signaling to

756 transcriptional control of lysosome homeostasis. *Sci Signal*. 5(228), ra42. DOI:  
757 10.1126/scisignal.2002790.

758 Sena, L.A., and Chandel, N.S. (2012). Physiological roles of mitochondrial reactive oxygen  
759 species. *Mol Cell*. 48(2), 158-167. DOI: 10.1016/j.molcel.2012.09.025.

760 Settembre, C., Di Malta, C., Polito, V.A., Garcia Arencibia, M., Vetrini, F., Erdin, S., Erdin,  
761 S.U., Huynh, T., Medina, D., Colella, P., et al. (2011). TFEB links autophagy to lysosomal  
762 biogenesis. *Science*. 332(6036), 1429-1433. DOI: 10.1126/science.1204592.

763 Settembre, C., Zoncu, R., Medina, D.L., Vetrini, F., Erdin, S., Erdin, S., Huynh, T., Ferron, M.,  
764 Karsenty, G., Vellard, M.C., et al. (2012). A lysosome-to-nucleus signalling mechanism  
765 senses and regulates the lysosome via mTOR and TFEB. *EMBO J*. 31(5), 1095-1108. DOI:  
766 10.1038/emboj.2012.32.

767 Shayman, J.A., and Abe, A. (2013). Drug induced phospholipidosis: an acquired lysosomal  
768 storage disorder. *Biochim Biophys Acta*. 1831(3), 602-611. DOI:  
769 10.1016/j.bbaliip.2012.08.013.

770 Shin, D.M., Jeon, B.Y., Lee, H.M., Jin, H.S., Yuk, J.M., Song, C.H., Lee, S.H., Lee, Z.W.,  
771 Cho, S.N., Kim, J.M., et al. (2010). Mycobacterium tuberculosis eis regulates autophagy,  
772 inflammation, and cell death through redox-dependent signaling. *PLoS Pathog*. 6(12),  
773 e1001230. DOI: 10.1371/journal.ppat.1001230.

774 Simeone, R., Bobard, A., Lippmann, J., Bitter, W., Majlessi, L., Brosch, R., and Enninga, J.  
775 (2012). Phagosomal rupture by Mycobacterium tuberculosis results in toxicity and host cell  
776 death. *PLoS Pathog*. 8(2), e1002507. DOI: 10.1371/journal.ppat.1002507.

777 Singhal, A., Jie, L., Kumar, P., Hong, G.S., Leow, M.K., Paleja, B., Tsenova, L., Kurepina, N.,  
778 Chen, J., Zolezzi, F., et al. (2014). Metformin as adjunct antituberculosis therapy. *Sci Transl*  
779 *Med*. 6(263), 263ra159. DOI: 10.1126/scitranslmed.3009885.

780 Sturgill-Koszycki, S., Schlesinger, P.H., Chakraborty, P., Haddix, P.L., Collins, H.L., Fok,  
781 A.K., Allen, R.D., Gluck, S.L., Heuser, J., and Russell, D.G. (1994). Lack of acidification in  
782 Mycobacterium phagosomes produced by exclusion of the vesicular proton-ATPase. *Science*.  
783 263(5147), 678-681. DOI: 10.1126/science.8303277.

784 Tailleux, L., Neyrolles, O., Honore-Bouakline, S., Perret, E., Sanchez, F., Abastado, J.P.,  
785 Lagrange, P.H., Gluckman, J.C., Rosenzweig, M., and Herrmann, J.L. (2003). Constrained  
786 intracellular survival of Mycobacterium tuberculosis in human dendritic cells. *J Immunol*.  
787 170(4), 1939-1948. DOI: 10.4049/jimmunol.170.4.1939.

788 Therapeutics, J. (2012). Sirturo (bedaquiline). US Food and Drug Administration, center for  
789 drug evaluation and research.  
790 [https://www.accessdata.fda.gov/drugsatfda\\_docs/nda/2012/204384Orig1s000PharmR.pdf](https://www.accessdata.fda.gov/drugsatfda_docs/nda/2012/204384Orig1s000PharmR.pdf)

791 Tousif, S., Singh, D.K., Ahmad, S., Moodley, P., Bhattacharyya, M., Van Kaer, L., and Das,  
792 G. (2014). Isoniazid induces apoptosis of activated CD4+ T cells: implications for post-therapy  
793 tuberculosis reactivation and reinfection. *J Biol Chem*. 289(44), 30190-30195. DOI:  
794 10.1074/jbc.C114.598946.

795 Tsankov, N., and Grozdev, I. (2011). Rifampicin--a mild immunosuppressive agent for  
796 psoriasis. *J Dermatolog Treat.* 22(2), 62-64. DOI: 10.3109/09546630903496975.

797 Ubeda, C., and Pamer, E.G. (2012). Antibiotics, microbiota, and immune defense. *Trends*  
798 *Immunol.* 33(9), 459-466. DOI: 10.1016/j.it.2012.05.003.

799 van der Wel, N., Hava, D., Houben, D., Fluitsma, D., van Zon, M., Pierson, J., Brenner, M.,  
800 and Peters, P.J. (2007). *M. tuberculosis* and *M. leprae* translocate from the phagolysosome to  
801 the cytosol in myeloid cells. *Cell.* 129(7), 1287-1298. DOI: 10.1016/j.cell.2007.05.059.

802 Wang, A., Luan, H.H., and Medzhitov, R. (2019). An evolutionary perspective on  
803 immunometabolism. *Science.* 363(6423). DOI: 10.1126/science.aar3932.

804 Wang, X., Grace, P.M., Pham, M.N., Cheng, K., Strand, K.A., Smith, C., Li, J., Watkins, L.R.,  
805 and Yin, H. (2013). Rifampin inhibits Toll-like receptor 4 signaling by targeting myeloid  
806 differentiation protein 2 and attenuates neuropathic pain. *FASEB J.* 27(7), 2713-2722. DOI:  
807 10.1096/fj.12-222992.

808 Weiss, G., and Schaible, U.E. (2015). Macrophage defense mechanisms against intracellular  
809 bacteria. *Immunol Rev.* 264(1), 182-203. DOI: 10.1111/imr.12266.

810 Wynn, T.A., Chawla, A., and Pollard, J.W. (2013). Macrophage biology in development,  
811 homeostasis and disease. *Nature.* 496(7446), 445-455. DOI: 10.1038/nature12034.

812 Yamamoto, A., Adachi, S., Ishikawa, K., Yokomura, T., and Kitani, T. (1971a). Studies on  
813 drug-induced lipidosis. 3. Lipid composition of the liver and some other tissues in clinical  
814 cases of "Niemann-Pick-like syndrome" induced by 4,4'-diethylaminoethoxyhexestrol. *J*  
815 *Biochem.* 70(5), 775-784. DOI: 10.1093/oxfordjournals.jbchem.a129695.

816 Yamamoto, A., Adachi, S., Kitani, T., Shinji, Y., and Seki, K. (1971b). Drug-induced lipidosis  
817 in human cases and in animal experiments. Accumulation of an acidic glycerophospholipid. *J*  
818 *Biochem.* 69(3), 613-615.

819 Yew, W.W., Chang, K.C., Chan, D.P., and Zhang, Y. (2019). Metformin as a host-directed  
820 therapeutic in tuberculosis: Is there a promise? *Tuberculosis (Edinb).* 115, 76-80. DOI:  
821 10.1016/j.tube.2019.02.004.

822 Yoshikawa, H. (1991). Effects of drugs on cholesterol esterification in normal and Niemann-  
823 Pick type C fibroblasts: AY-9944, other cationic amphiphilic drugs and DMSO. *Brain Dev.*  
824 13(2), 115-120.

825 Zhang, Y., and Mitchison, D. (2003). The curious characteristics of pyrazinamide: a review.  
826 *Int J Tuberc Lung Dis.* 7(1), 6-21.

827

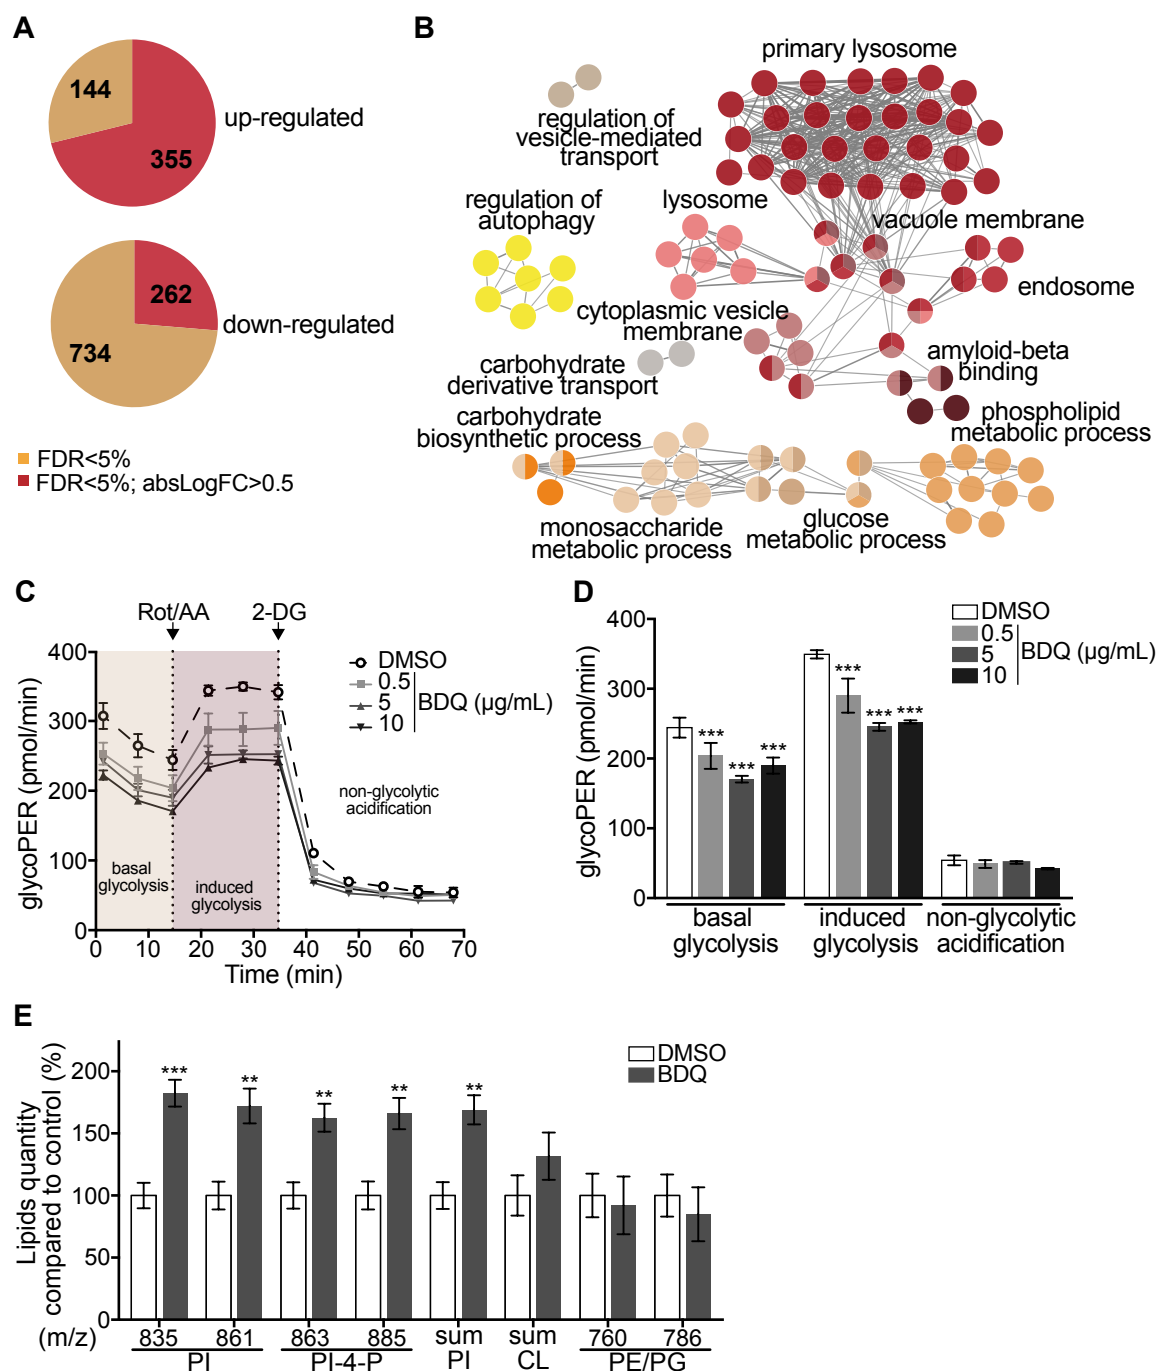

**Figure 1.** BDQ modulates the response of MTB-infected Mφs. Cells from four donors were infected with BDQ resistant MTB for 24 h and then treated with BDQ (5 μg/mL) for an additional 18 h. Differentially-expressed genes were identified by mRNAseq. See also *Figure supplement 3*. **(A)** Pie chart showing the number of genes regulated by BDQ treatment relative to untreated control. **(B)** Gene ontology enrichment analysis of genes whose expression is up-regulated by BDQ treatment, using the Cytoscape app ClueGO (FDR<0.05; LogFC>0.5). **(C-D)** The Glycolytic Rate Assay was performed in BDQ-treated Mφs, in the presence of rotenone/antimycin A (Rot/AA) and 2-deoxy-D-glycose (2-DG), inhibitors of the mitochondrial electron transport chain and glycolysis, respectively. (one-way ANOVA test). One representative experiment (of two) is shown. **(E)** Lipid profile of BDQ-treated cells by MALDI-TOF (unpaired two tailed Student's t test). PI: Phosphatidylinositol; CL: Cardiolipids; PE: Phosphatidylethanolamine; PG: Phosphatidylglycerol. Numbers correspond to mass-to-charge ratio (m/z). Cells derived from 3 donors were analyzed. Error bars represent the mean ± SD and significant differences between treatments are indicated by an asterisk, in which \* p < 0.05, \*\* p < 0.01, \*\*\* p < 0.001.

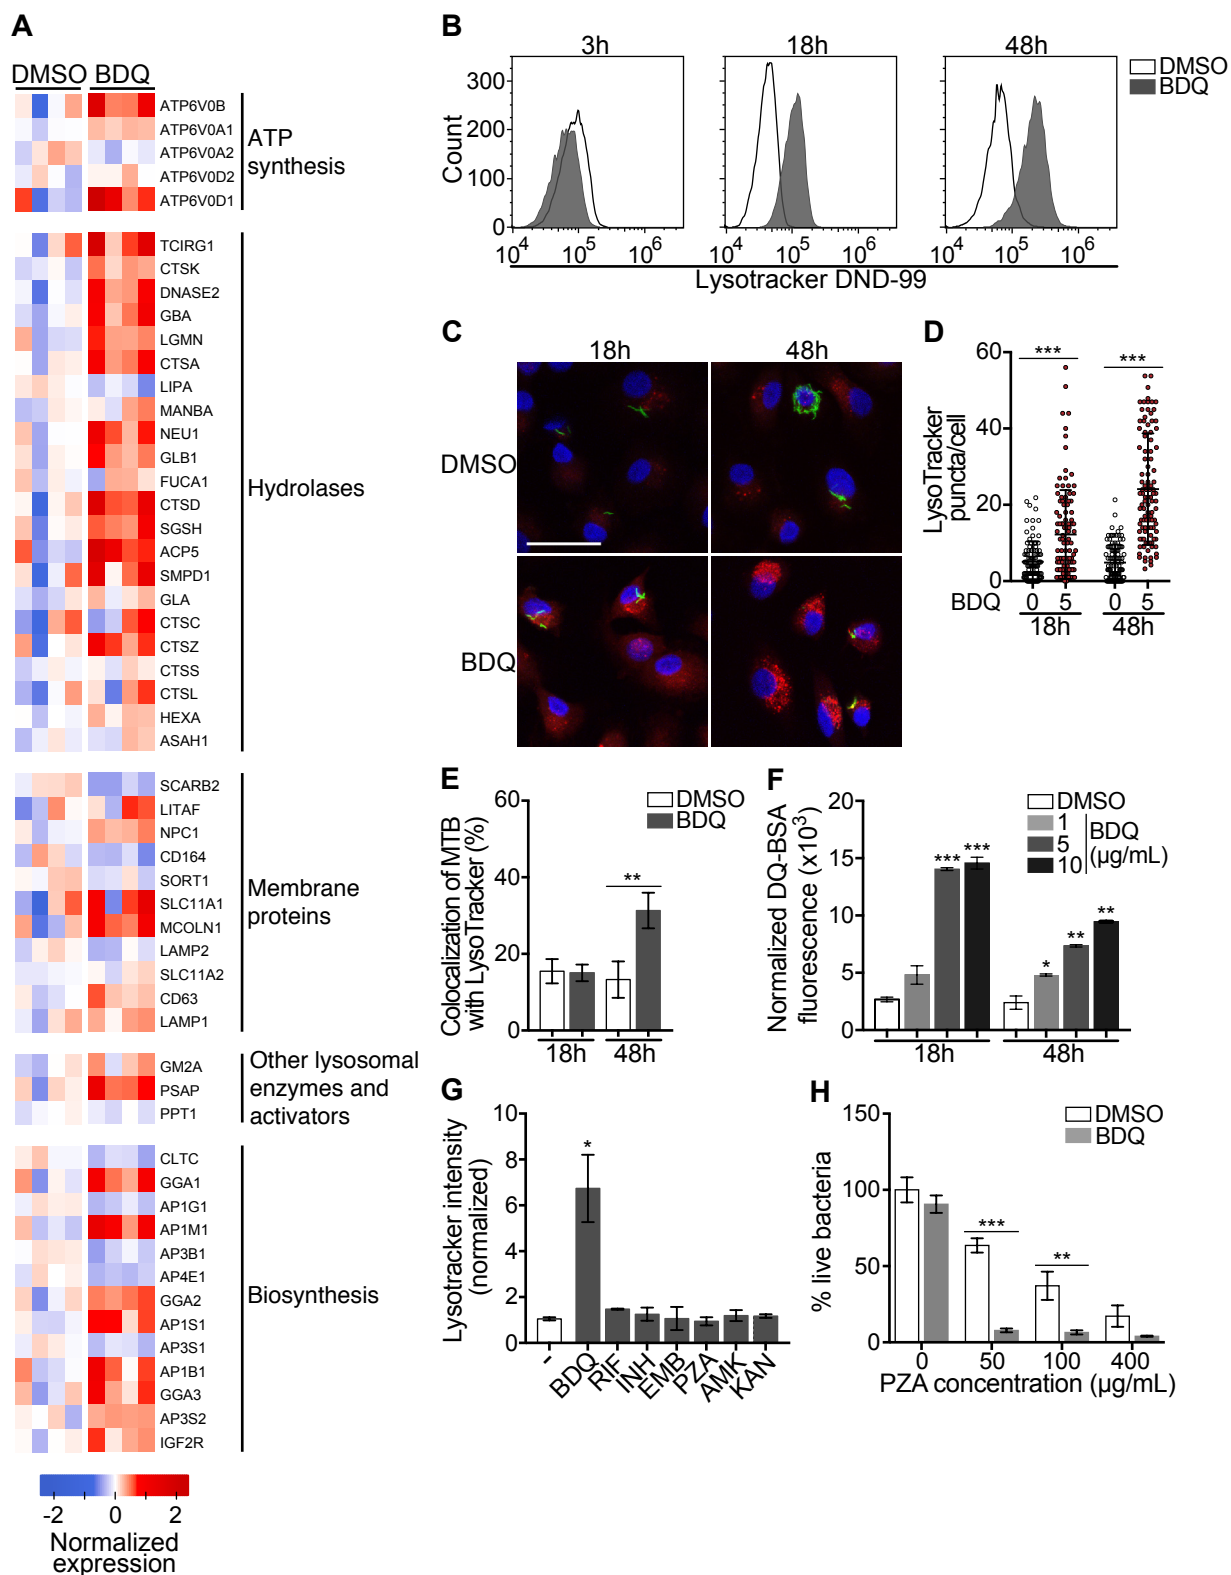

**Figure 2.** BDQ activates the lysosomal pathway in human MTB-infected M $\phi$ s. **(A)** Heatmap showing differential expression of genes included in the Lysosome KEGG category (FDR<0.05%). Each column corresponds to one donor. Data were normalized to determine the log ratio with respect to the median expression of each gene. **(B)** M $\phi$ s were infected with BDQr-MTB expressing the GFP protein and incubated with BDQ (5  $\mu\text{g/mL}$ ) for 3 h, 18 h and 48 h. Acid organelles were then labeled with 100 nM LysoTracker DND-99 for 1 hour. The fluorescence intensity was quantified by flow cytometry. **(C-E)** Cells were infected with GFP expressing BDQr-MTB (green) and treated with BDQ (5  $\mu\text{g/mL}$ ). After 18 h and 48 h of treatment, cells were labelled with LysoTracker (red) and fluorescence was analyzed by confocal microscopy. DAPI (blue) was used to visualize nuclei (scale bar: 10  $\mu\text{m}$ ). The quantification of LysoTracker staining and the percentage of LysoTracker-positive MTB phagosomes were performed using Icy software. **(F)** M $\phi$ s were activated with heat-killed MTB and treated with BDQ for 18 h and 48 h. Cells were then incubated with DQ-Green BSA. Fluorescence was quantified by flow cytometry. Significant differences between BDQ treatment and control (DMSO) are indicated by an asterisk. **(G)** M $\phi$ s were incubated for 48 h with BDQ, rifampicin (RIF, 20  $\mu\text{g/mL}$ ), isoniazid (INH, 10  $\mu\text{g/mL}$ ), ethambutol (EMB, 20  $\mu\text{g/mL}$ ), pyrazinamide (PZA, 200  $\mu\text{g/mL}$ ), amikacin (AMK, 20  $\mu\text{g/mL}$ ) and kanamycin (KAN, 20  $\mu\text{g/mL}$ ), and then stained with LysoTracker. Fluorescence intensity was analyzed by flow cytometry. **(H)** Cells were infected with BDQr-MTB (MOI: 0.5) and treated with BDQ (1  $\mu\text{g/mL}$ ) and PZA. After 7 days treatment, cells were lysed and bacteria were enumerated by CFU (counted in triplicate). One representative experiment (of at least three) is shown. Error bars represent the mean  $\pm$  SD. \*  $p < 0.05$ , \*\*  $p < 0.01$ , \*\*\*  $p < 0.001$ .

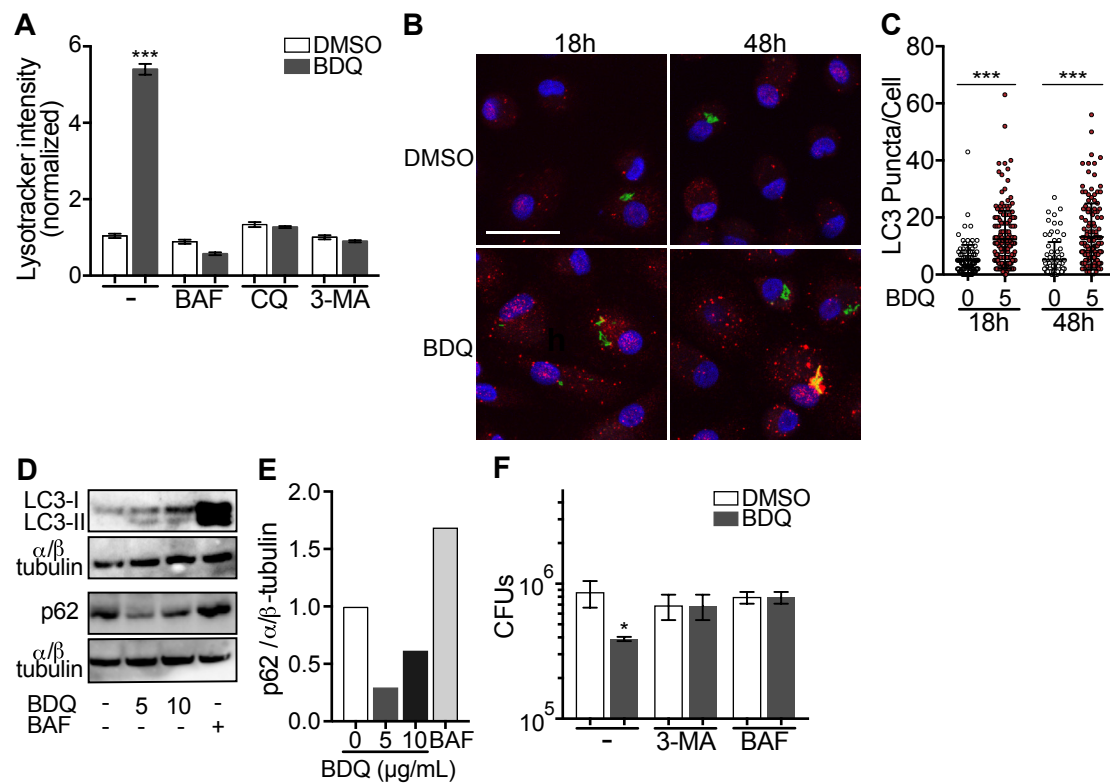

**Figure 3.** BDQ induced autophagy in MTB-infected Mφs. **(A)** BDQr-MTB infected Mφs were incubated with BDQ (5 μg/mL) and different inhibitors of autophagy; bafilomycin (BAF, 100 nM), chloroquine (CQ, 40 μM) and 3-methyladenine (3-MA, 5 mM). After 48 h, acidic compartments were stained with LysoTracker and fluorescence quantified by flow cytometry. **(B)** Detection by indirect immunofluorescence of LC3 (red) in BDQr-MTB (green) infected Mφs, treated with BDQ for 18 h and 48 h (scale bar: 10 μm). DAPI (blue) was used to visualize nuclei. **(C)** Determination of the number of LC3-positive puncta per cell (one-way ANOVA test). **(D)** Western blot analysis of LC3, p62, and α/β-tubulin in MTB-infected cells treated with BDQ and BAF. **(E)** Densitometric quantification of p62 staining. **(F)** BDQr-MTB infected Mφs were left untreated or incubated with BDQ, 3-methyladenine (3-MA) and/or bafilomycin (BAF). After 48h, the number of intracellular bacteria was enumerated. One representative experiment (of three) is shown. Error bars represent the mean ± SD. \* p < 0.05, \*\* p < 0.01, \*\*\* p < 0.001.



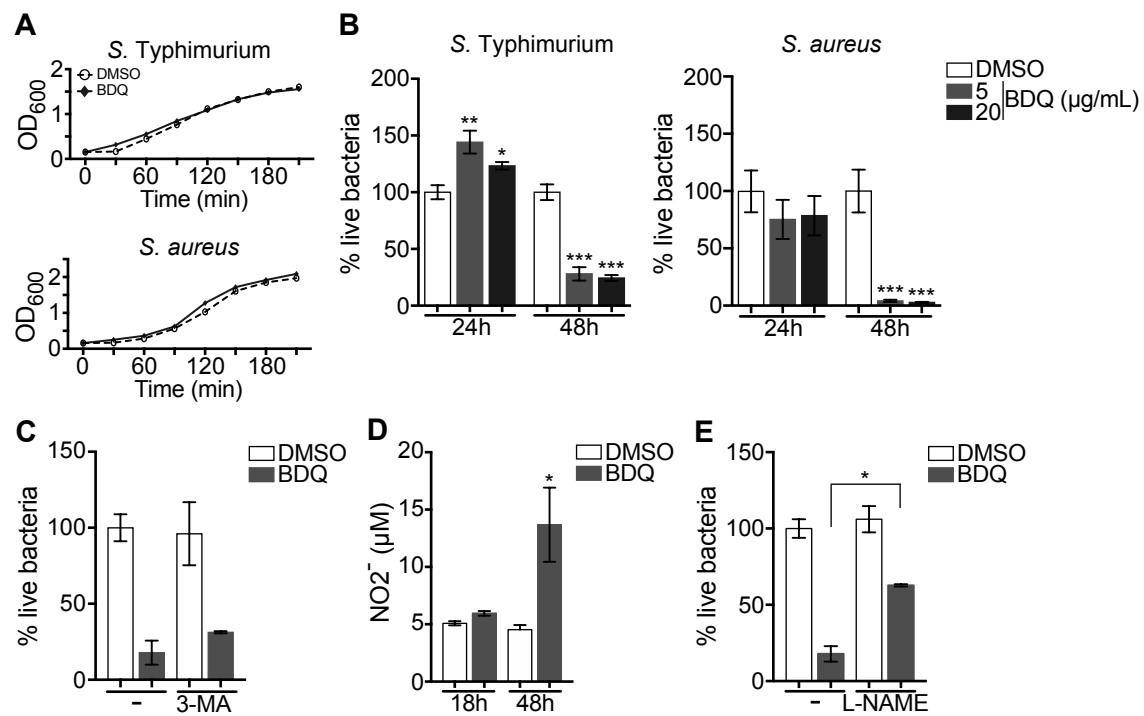

**Figure 4.** BDQ increases Mφs bactericidal functions. **(A)** Growth of *S. Typhimurium* and *S. aureus* in liquid medium in the presence of BDQ (20 μg/mL). **(B)** Mφs were incubated with BDQ and then infected with *S. Typhimurium* or *S. aureus*. The number of intracellular bacteria was enumerated at 24 h post-infection. **(C)** BDQ-treated Mφs were incubated with 3-MA and then infected with *S. aureus*. The number of bacteria was counted as previously. **(D)** Quantification of NO<sub>2</sub><sup>-</sup> in the supernatant of Mφs incubated with BDQ for 18 h and 48 h. **(E)** Cells were treated as in (C), 3-MA was replaced by L-NAME (0.1 mM), an inhibitor of nitric oxide (NO) synthesis. One representative experiment (of three) is shown. Error bars represent the mean ± SD. Unpaired two-tailed Student's t test was used. \* p < 0.05, \*\* p < 0.01, \*\*\* p < 0.001.



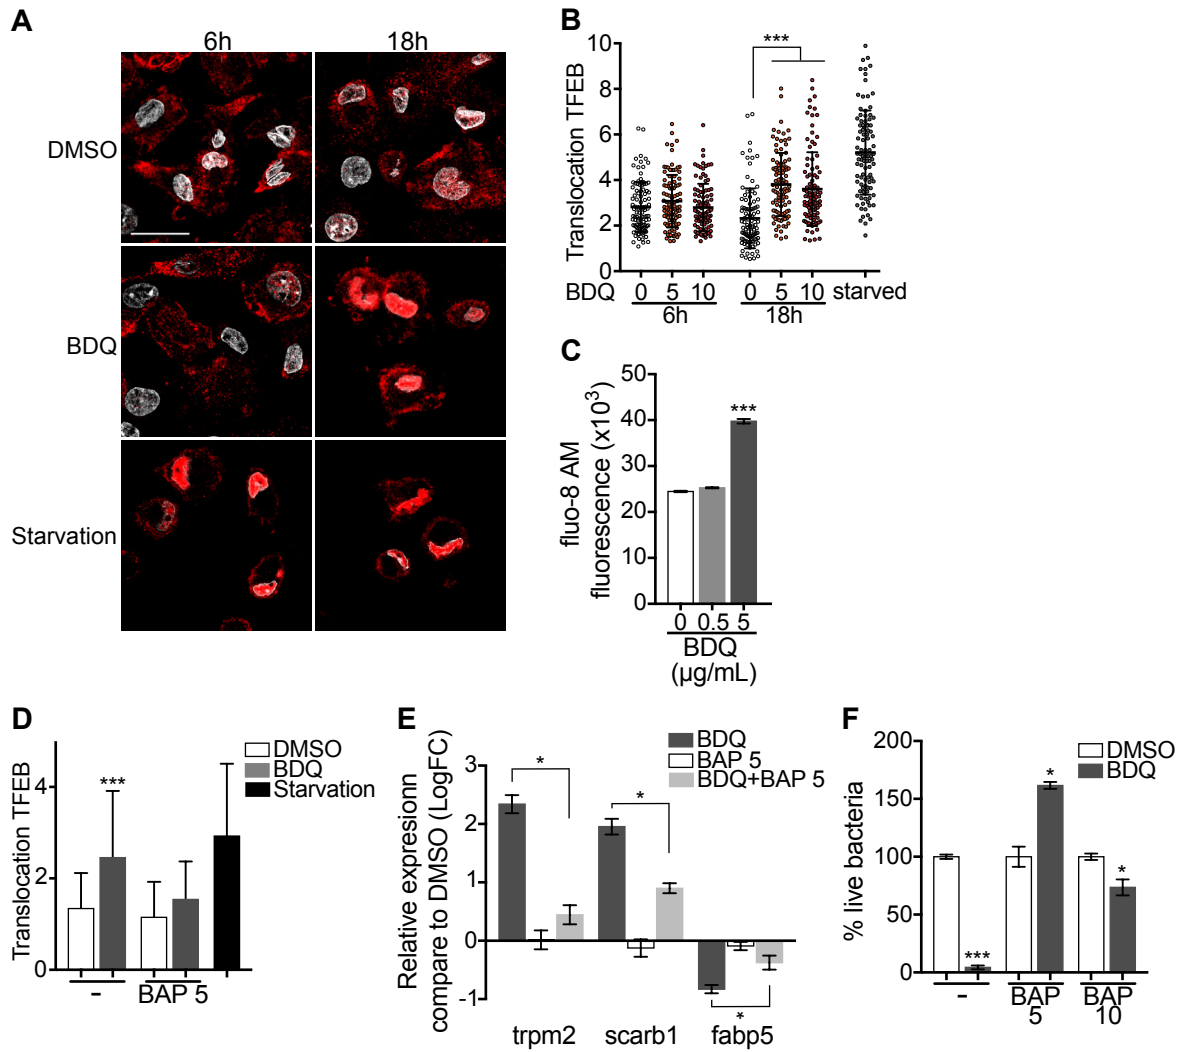

**Figure 6.** Calcium-dependent activation of TFEB by BDQ. **(A)** Representative fluorescence microscopy images of Mφs treated with BDQ for 6 h and 18 h, or incubated in HBSS medium for 1 h (starvation). Cells were stained with antibody against TFEB (red). DAPI (white) was used to visualize nuclei. Scale bar: 10  $\mu\text{m}$ . **(B)** Ratio between nuclear and cytosolic TFEB fluorescence intensity ( $n > 100$  cells per condition, two-way ANOVA test). **(C)** Mφs were treated with BDQ for 18 h and then loaded with the fluorescent calcium binding dye Fluo-8 AM. After 1 h of incubation,  $\text{Ca}^{2+}$  concentration was monitored by FLUOstar Omega. **(D)** Ratio between nuclear and cytosolic TFEB fluorescence intensity in starved cells and in cells treated with BDQ and/or with the intracellular calcium chelator BAPTA (BAP). ( $n > 100$  cells per condition, two-way ANOVA test). **(E)** Relative gene expression measured by RT-qPCR for a panel of differentially expressed lysosomal genes. BDQ treated-Mφs were either left untreated or incubated with BAPTA. Relative expression levels were normalized to the *rpl24* gene. **(F)** Mφs were treated with BDQ with or without BAPTA, and then infected with *S. aureus*. After 1 day, the cells were lysed and the number of intracellular bacterial colonies was counted (unpaired two tailed Student's t test). Error bars represent the mean  $\pm$  SD. was used. \*  $p < 0.05$ , \*\*  $p < 0.01$ , \*\*\*  $p < 0.001$ .

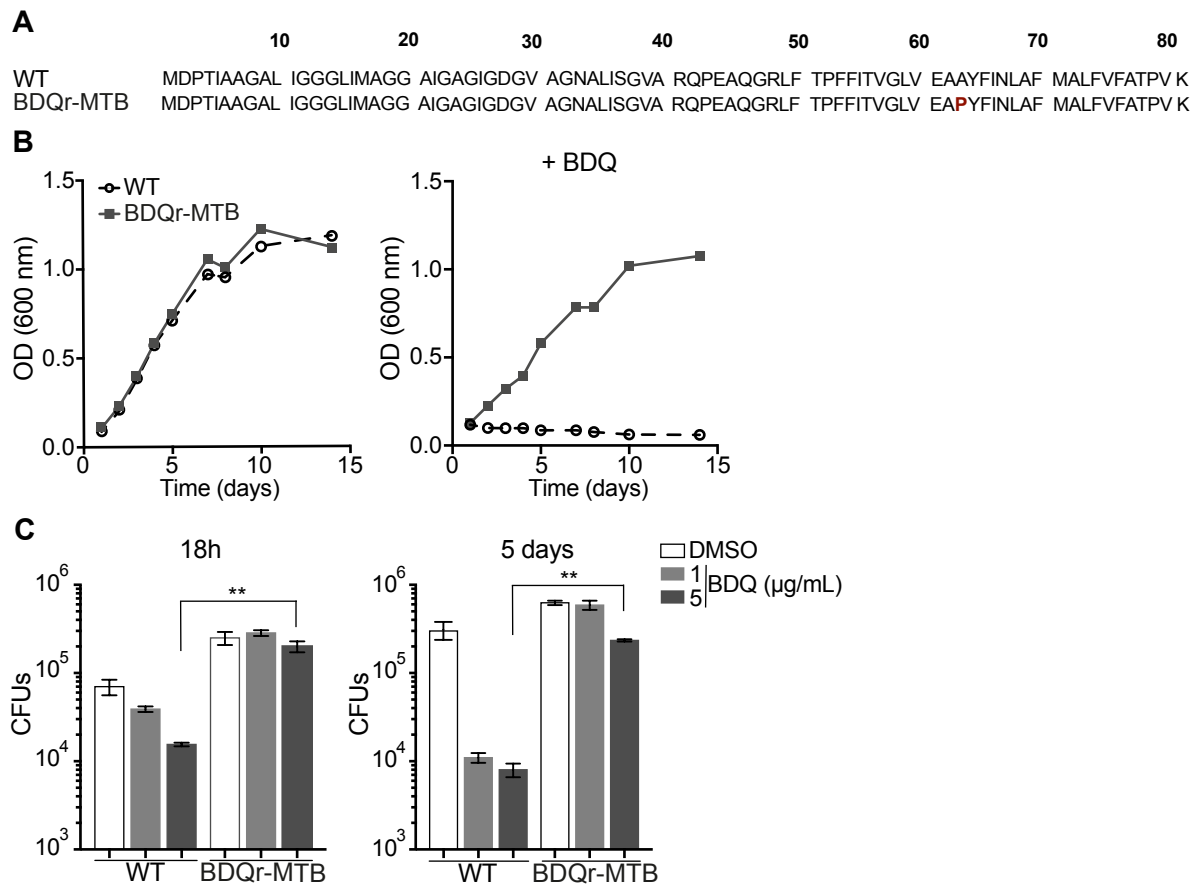

**Figure supplement 1.** Generation of BDQ resistant MTB strain (BDQr-MTB). **(A)** Amino acid sequence alignment of the ATP synthase c-subunit gene in wild-type (WT) and BDQ-resistant H37Rv strain. The mutation was indicated in red, at position 63. **(B)** Optical density (OD) measurements of bacterial growth of WT and BDQr-MTB. Bacteria were cultured in 7H9 medium supplemented with 10% OADC enrichment with/without BDQ. **(C)** Intracellular growth of wild-type (WT) and BDQ-resistant H37Rv strain. Mφs were infected with the 2 strains and incubated with BDQ. After 18 h and 5 days, the cells were lysed and the number of bacterial colonies was counted. One representative experiment (of three) is shown. Results are means  $\pm$  SD. \*\*  $p < 0.01$ , unpaired two tailed Student's t test.

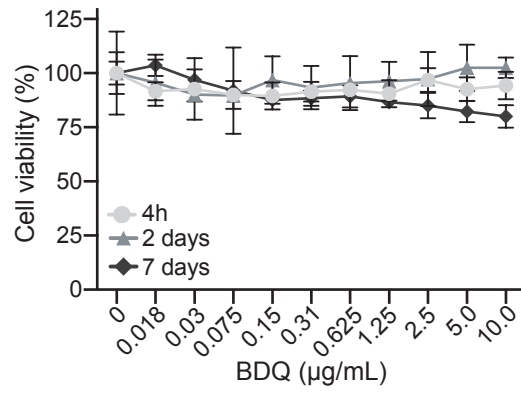

**Figure supplement 2.** Cell viability assay of Mφs incubated with BDQ. Cells were treated with various concentrations of BDQ. After 4 h, 2 and 7 days, cell viability was evaluated with the MTT assay (Trevigen) according to the manufacturer's instructions. Results represent the mean  $\pm$  SD of 3 replicates. One representative experiment (out of three) is shown.

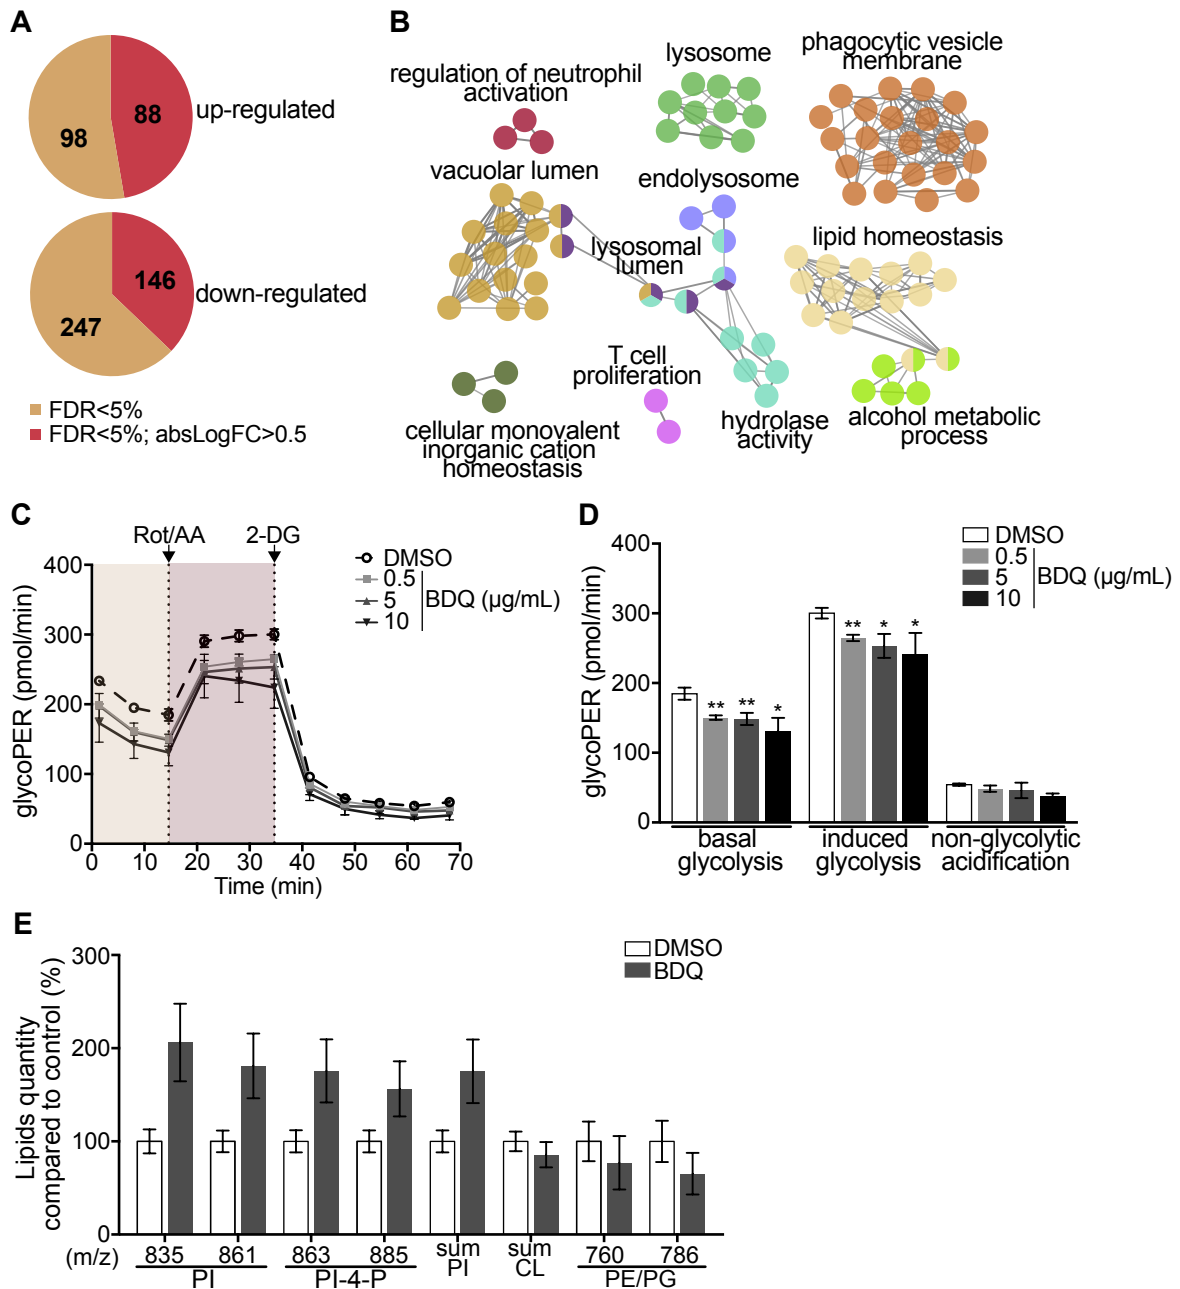

**Figure supplement 3.** BDQ modulates the response of unactivated Mφs. Related to *Figure 1*. Cells from four individual donors were treated with BDQ (5 μg/mL) for 18 h. The differentially-expressed genes were then identified by mRNAseq. **(A)** Venn diagram showing the number of genes regulated by BDQ treatment relative to untreated controls. **(B)** Gene ontology enrichment analysis of genes whose expression is upregulated by BDQ treatment, using the Cytoscape app ClueGO (FDR<0.05; LogFC>0.5). **(C-D)** The Glycolytic Rate Assay was performed in Mφs, in the presence of rotenone/antimycin A (Rot/AA) and 2-deoxy-D-glucose (2-DG), respectively inhibitors of mitochondrial electron transport chain and of glycolysis. (one-way ANOVA test). One representative experiment (of two) is shown. **(E)** Lipid profile of cells by MALDI-TOF (unpaired two tailed Student's t test). PI: Phosphatidylinositol; CL: Cardiolipids; PE: Phosphatidylethanolamine; PG: Phosphatidylglycerol. Numbers correspond to mass-to-charge ratio (m/z). Cells derived from 3 donors were analyzed. Error bars represent the mean ± SD and significant differences between treatments are indicated by an asterisk, in which \* p < 0.05, \*\* p < 0.01, \*\*\* p < 0.001.

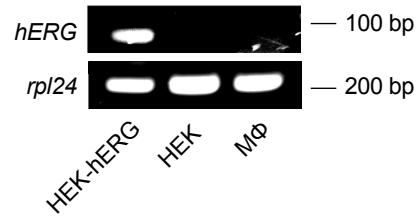

**Figure supplement 4.** The *hERG* gene is not expressed in human monocyte-derived Mφs. RT-qPCR was performed in order to detect *hERG* mRNA expression in Mφs, in *hERG*-transfected and non-transfected HEK293 cells (kind gift from Craig T. January, University of Wisconsin–Madison). *rpl24* was used as control gene.

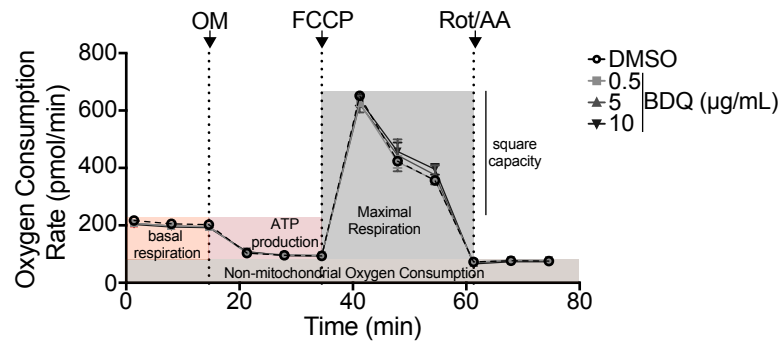

**Figure supplement 5.** Oxygen consumption rate (OCR) measured by Seahorse extracellular flux assay of cells incubated with BDQ for 48h. Related to *Figure 5*. Basal respiration, ATP production, maximal respiration, respiratory reserve and nonmitochondrial respiration were followed by sequential additions of oligomycin (OM, an inhibitor of the ATPase), the mitochondrial oxidative phosphorylation uncoupler FCCP, and the inhibitors of electron transport antimycin A/rotenone (Rot/AA). Error bars represent the mean  $\pm$  SD of 3 technical replicates. One representative experiment (out of two) is shown.
